# Supplementary material for: Conformationally Restricted Glycoconjugates Derived from Arylsulfonamides and Coumarins: New Families of Tumour-Associated Carbonic Anhydrase Inhibitors
Source: MDPI journal article supplement (doi:10.3390/ijms24119401), 2023-05-28
Supplement: s1 [file s1]

## SUPPORTING INFORMATION

# Conformationally-restricted glycoconjugates derived from arylsulfonamides and coumarins: new families of tumour-associated carbonic anhydrase inhibitors

Mónica Martínez-Montiel<sup>1,2</sup>, Laura L. Romero-Hernández<sup>1</sup>, Simone Giovannuzzi<sup>3</sup>, Paloma Begines<sup>3</sup>, Adrián Puerta<sup>4</sup>, Ana I. Ahuja-Casarín<sup>1</sup>, Miguel X. Fernandes<sup>4</sup>, Penélope Merino-Montiel<sup>1</sup>, Sara Montiel-Smith<sup>1</sup>, Alessio Nocentini<sup>3</sup>, José M. Padrón<sup>4</sup>, Claudiu T. Supuran<sup>3</sup>, José G. Fernández-Bolaños<sup>2</sup> and Óscar López<sup>2,\*</sup>

<sup>1</sup>Facultad de Ciencias Químicas, Ciudad Universitaria, Benemérita Universidad Autónoma de Puebla, 72570 Puebla, PUE, México

<sup>2</sup>Departamento de Química Orgánica, Facultad de Química, Universidad de Sevilla, Apartado 1203, Seville, E-41071, Spain

<sup>3</sup>NEUROFARBA Department, Sezione di Scienze Farmaceutiche e Nutraceutiche, University of Florence, Florence, 50019

<sup>4</sup>BioLab, Instituto Universitario de Bio-Organica "Antonio González" (IUBO-AG), Universidad de La Laguna, c/Astrofísico Francisco Sánchez 2, La Laguna, E-38206, Spain

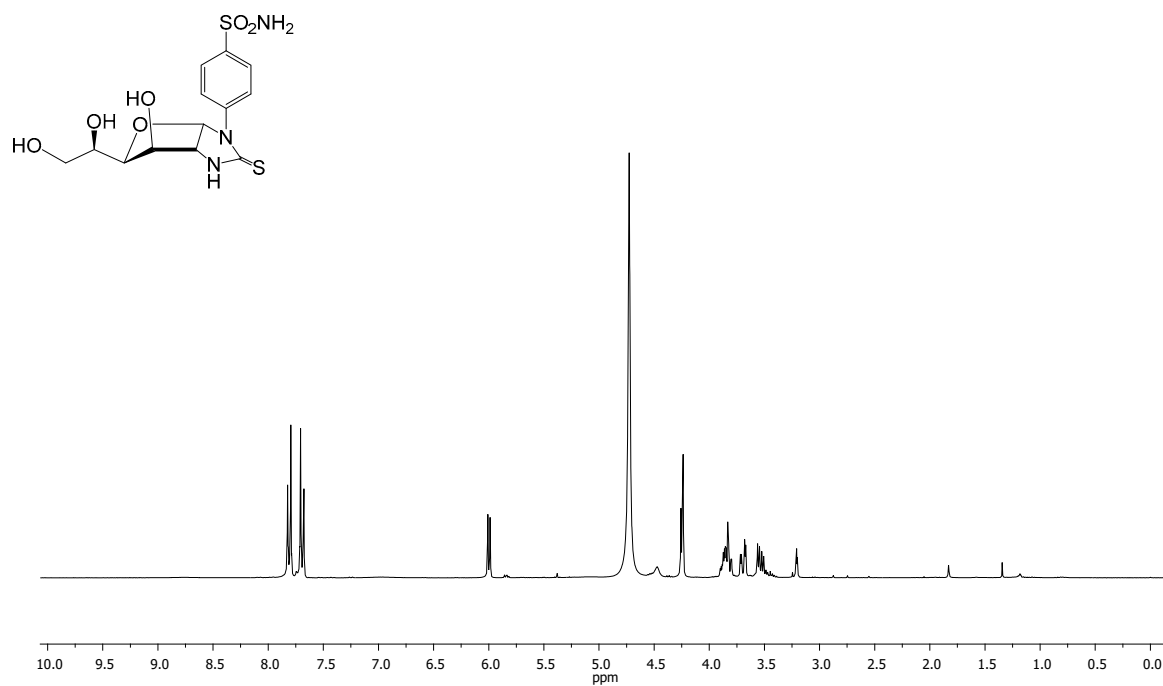

**Figure S1.** <sup>1</sup>H-NMR spectrum of **8a** (300 MHz, CD<sub>3</sub>OD)

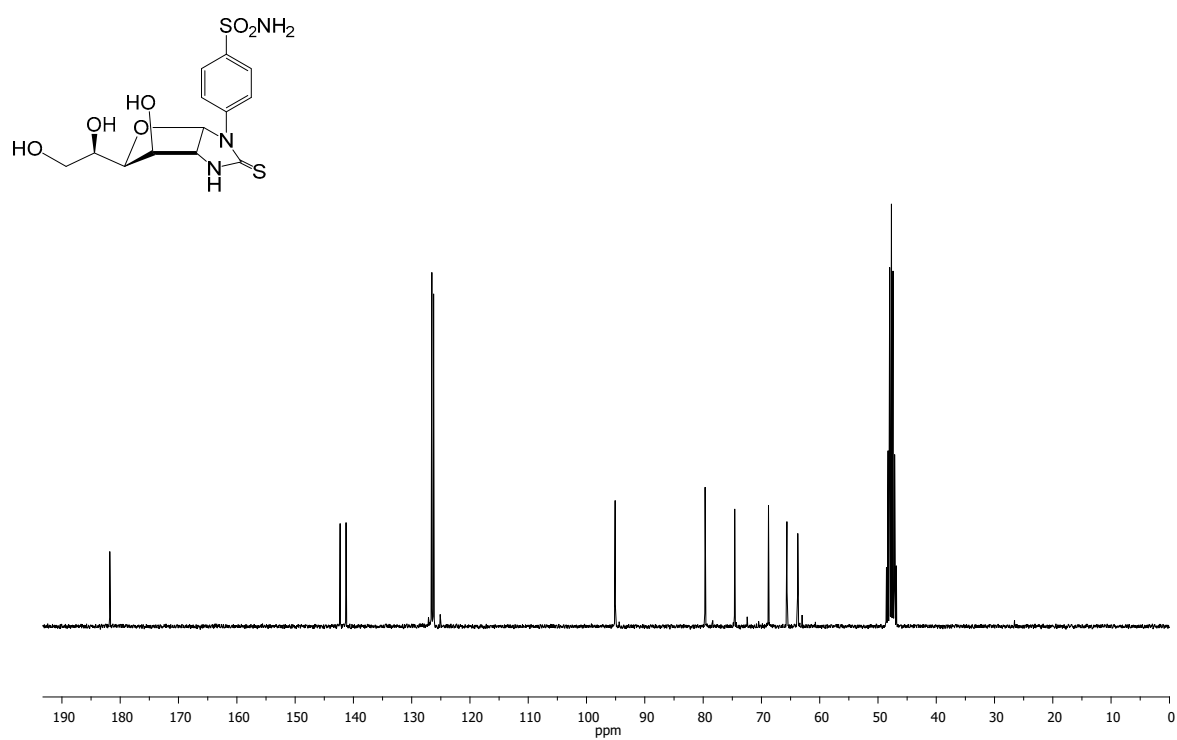

**Figure S2.** <sup>13</sup>C-NMR spectrum of **8a** (75.5 MHz, CD<sub>3</sub>OD)

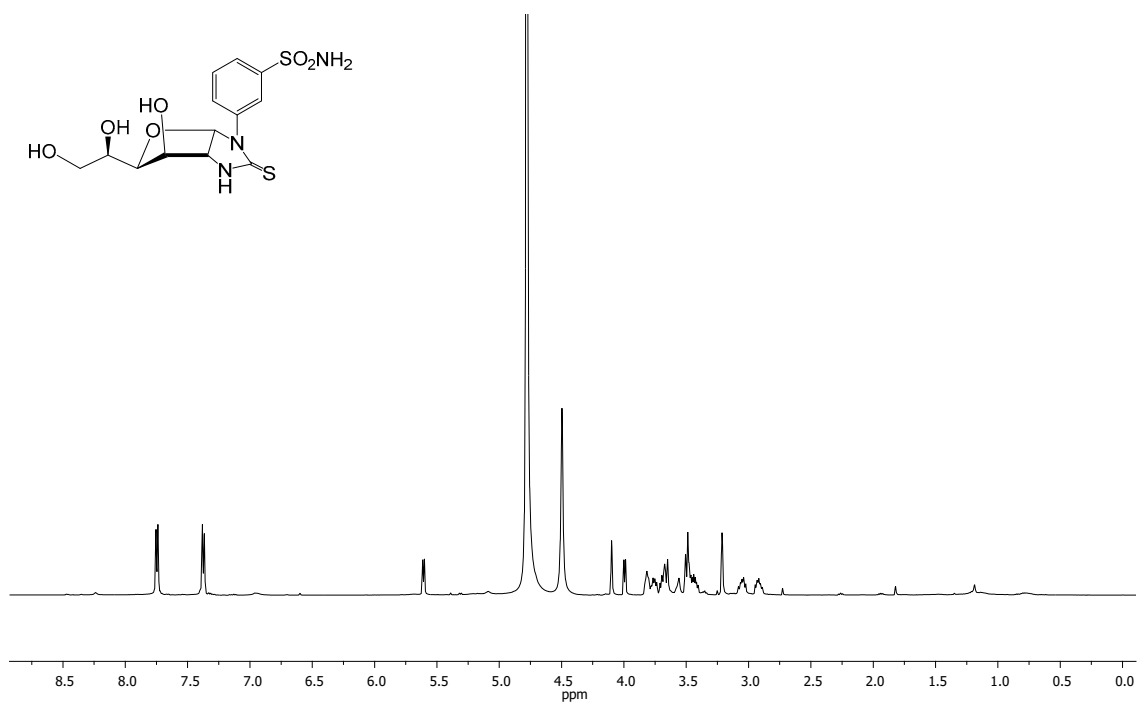

**Figure S3.**  $^1\text{H}$ -NMR spectrum of **8b** (300 MHz,  $\text{CD}_3\text{OD}$ )

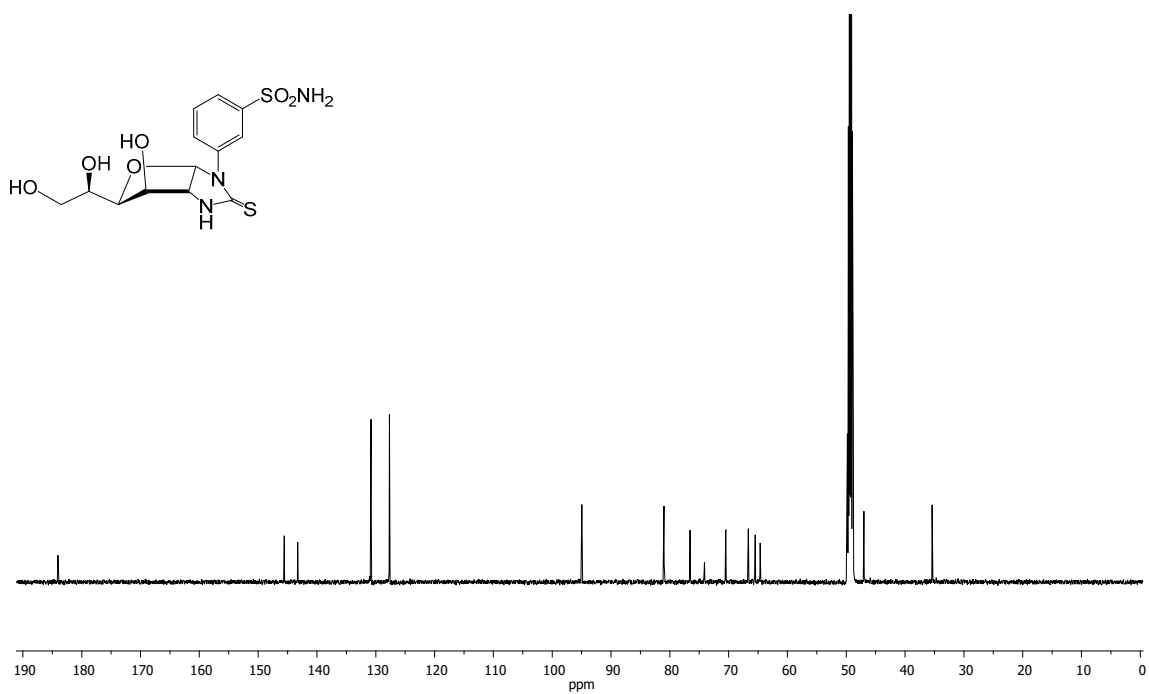

**Figure S4.**  $^{13}\text{C}$ -NMR spectrum of **8b** (75.5 MHz,  $\text{CD}_3\text{OD}$ )

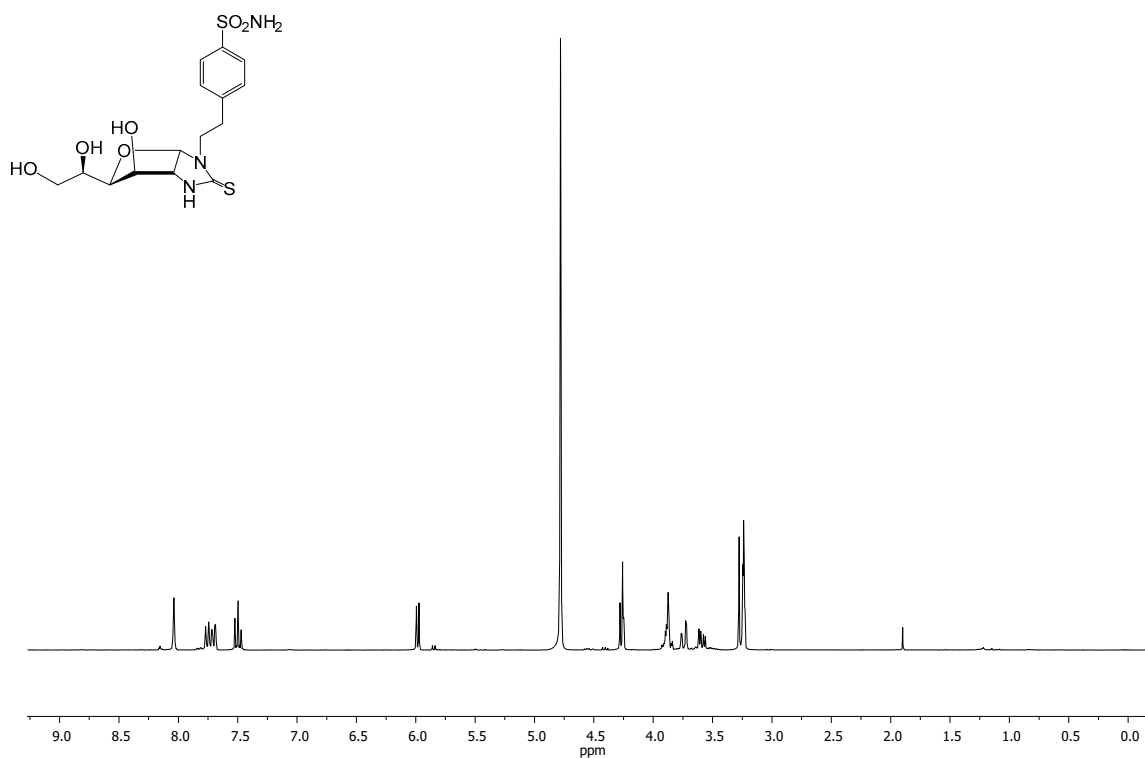

**Figure S5.**  $^1\text{H}$ -NMR spectrum of **8c** (300 MHz,  $\text{CD}_3\text{OD}$ )

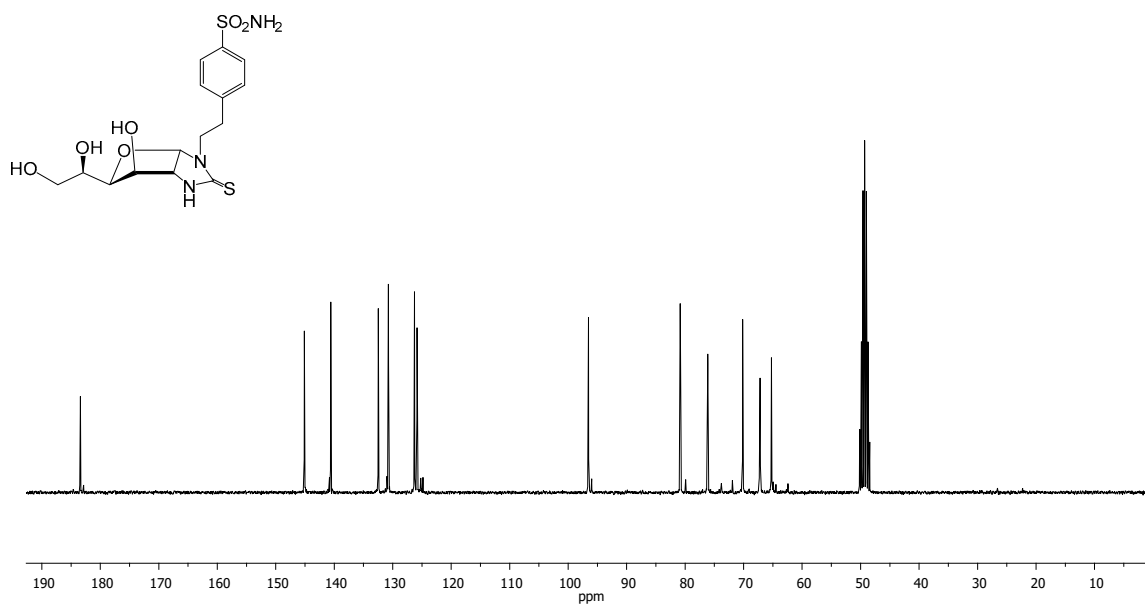

**Figure S6.**  $^{13}\text{C}$ -NMR spectrum of **8c** (75.5 MHz,  $\text{CD}_3\text{OD}$ )

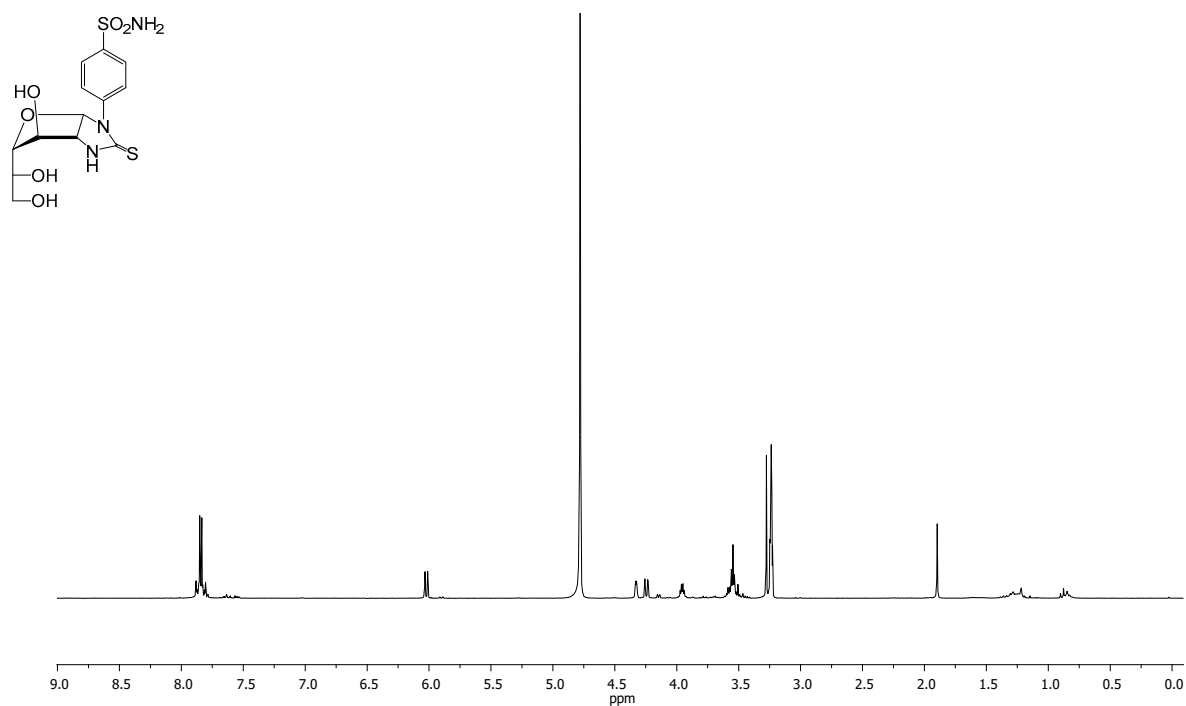

**Figure S7.** <sup>1</sup>H-NMR spectrum of **9a** (300 MHz, CD<sub>3</sub>OD)

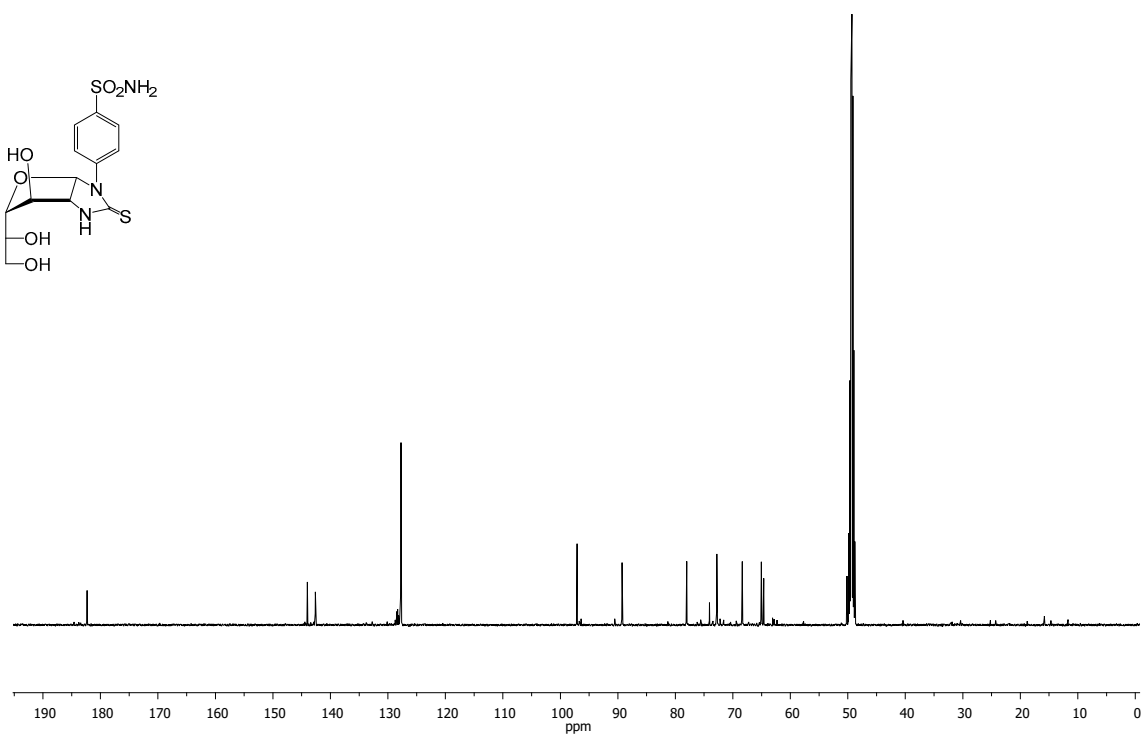

**Figure S8.** <sup>13</sup>C-NMR spectrum of **9a** (125.7 MHz, CD<sub>3</sub>OD)

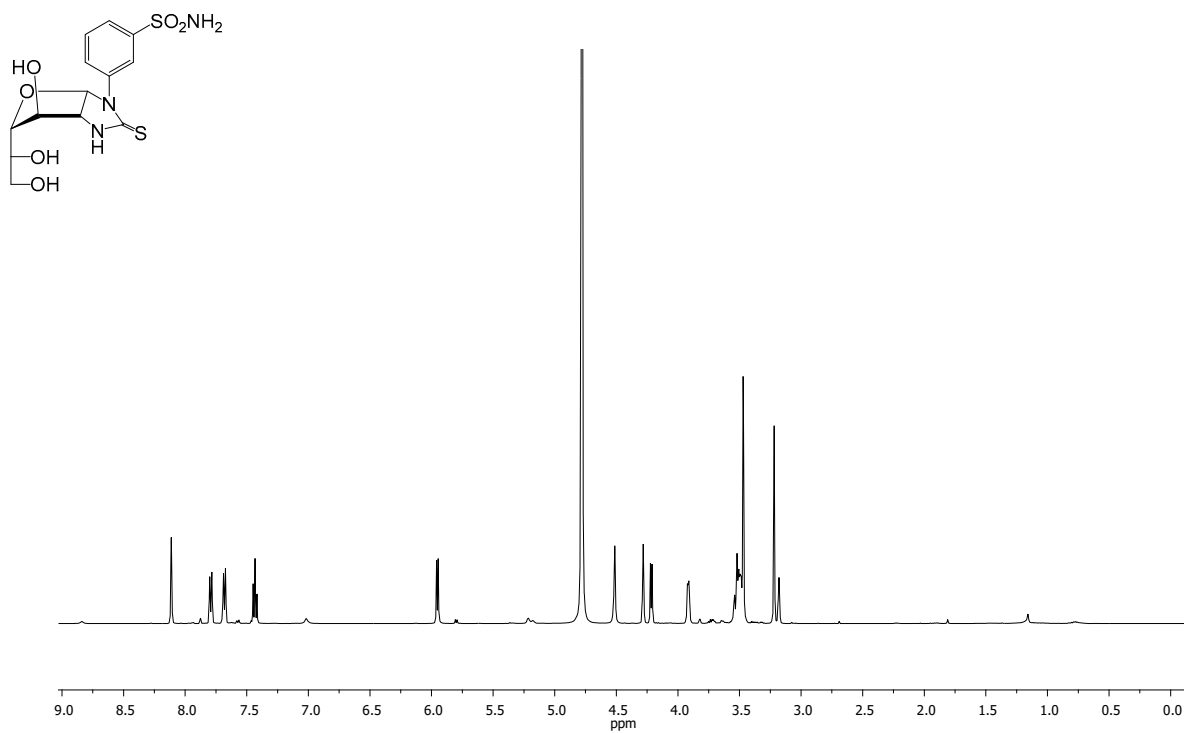

**Figure S9.** <sup>1</sup>H-NMR spectrum of **9b** (300 MHz, CD<sub>3</sub>OD)

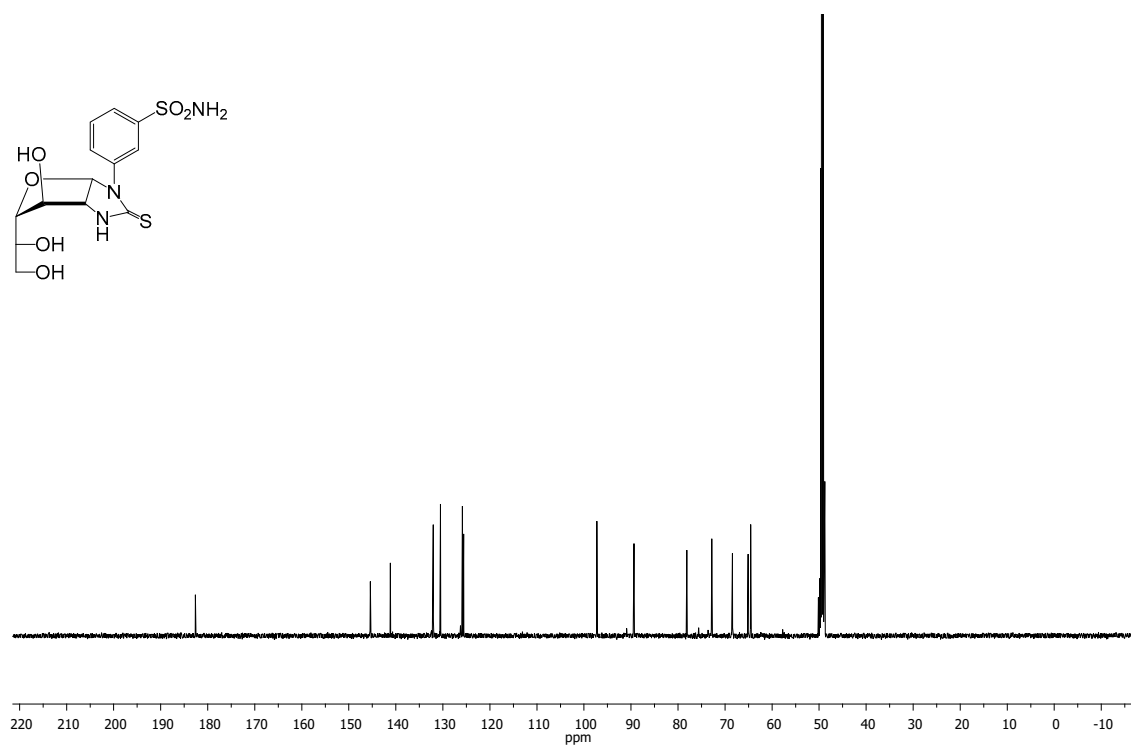

**Figure S10.** <sup>13</sup>C-NMR spectrum of **9b** (125.7 MHz, CD<sub>3</sub>OD)

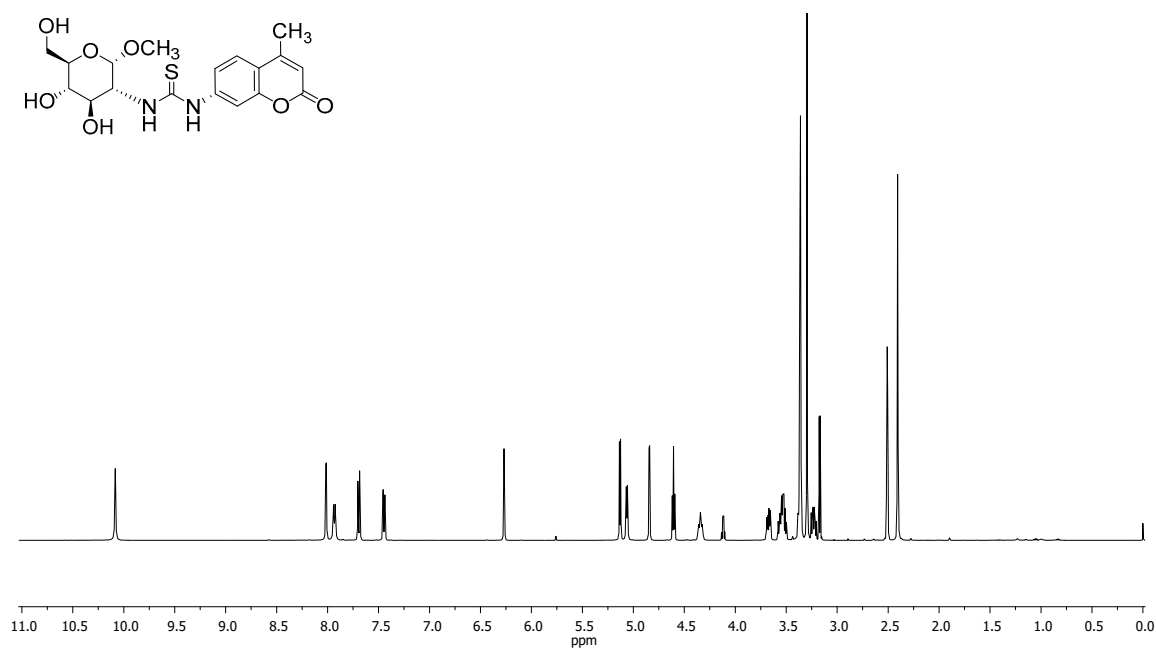

**Figure S11.** <sup>1</sup>H-NMR spectrum of **13** (500 MHz, DMSO-*d*<sub>6</sub>)

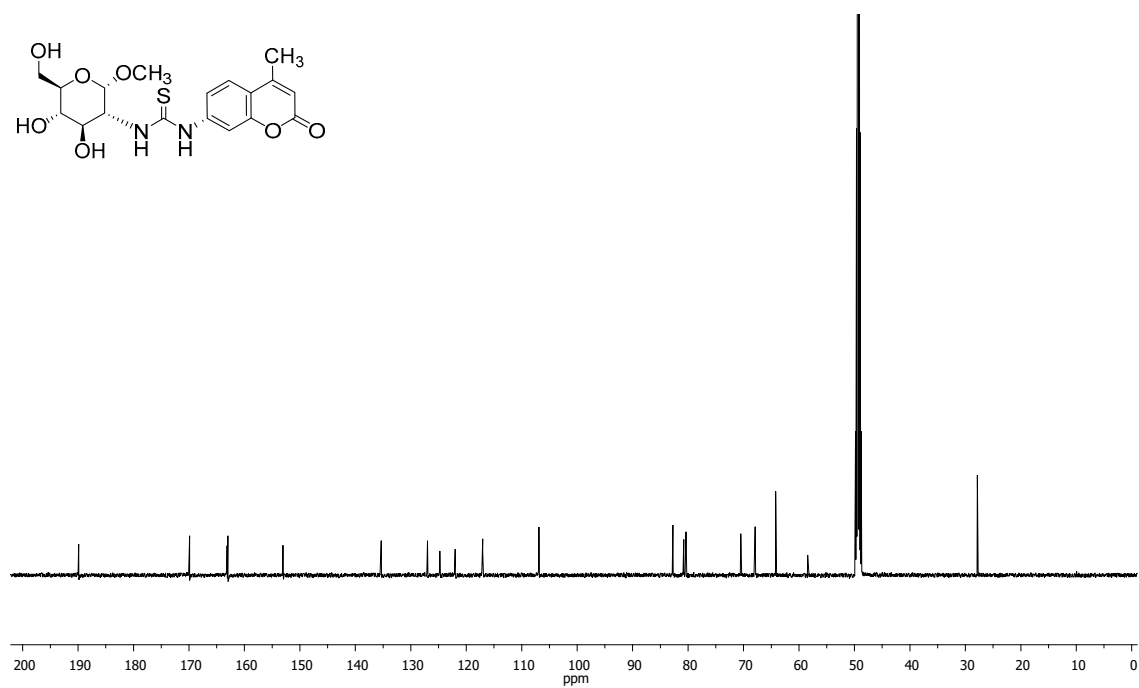

**Figure S12.** <sup>13</sup>C-NMR spectrum of **13** (125.7 MHz, DMSO-*d*<sub>6</sub>)

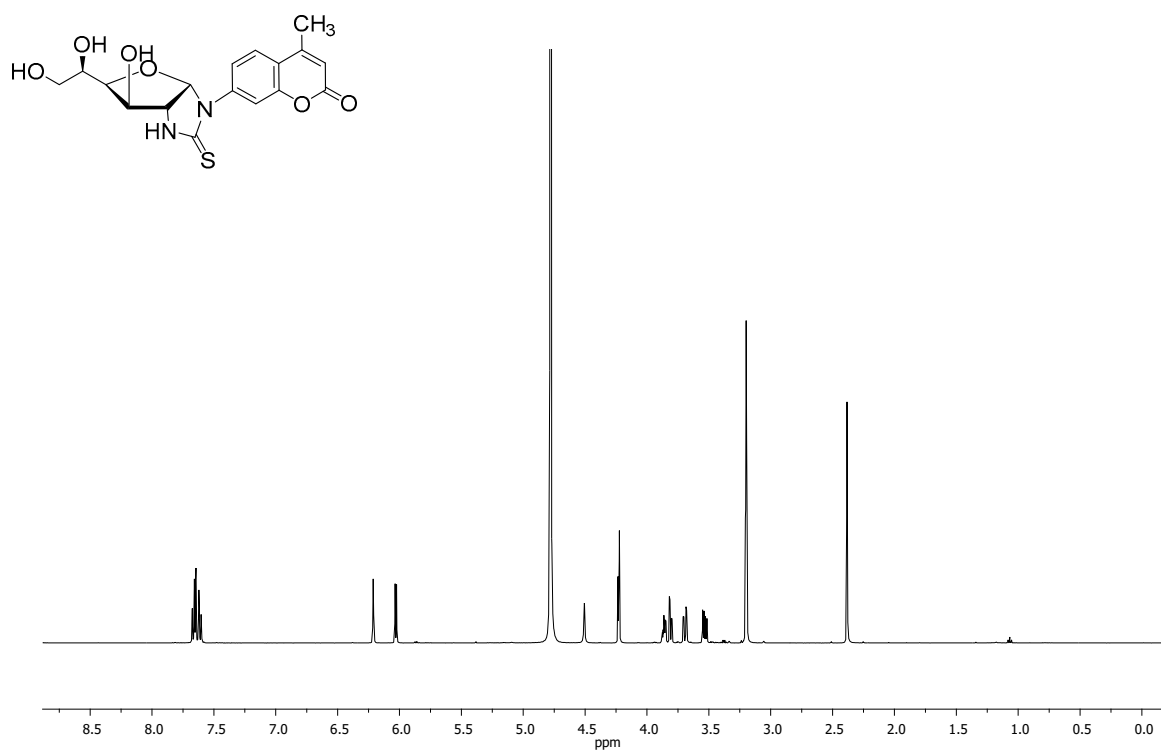

**Figure S13.** <sup>1</sup>H-NMR spectrum of **16** (500 MHz, DMSO-*d*<sub>6</sub>)

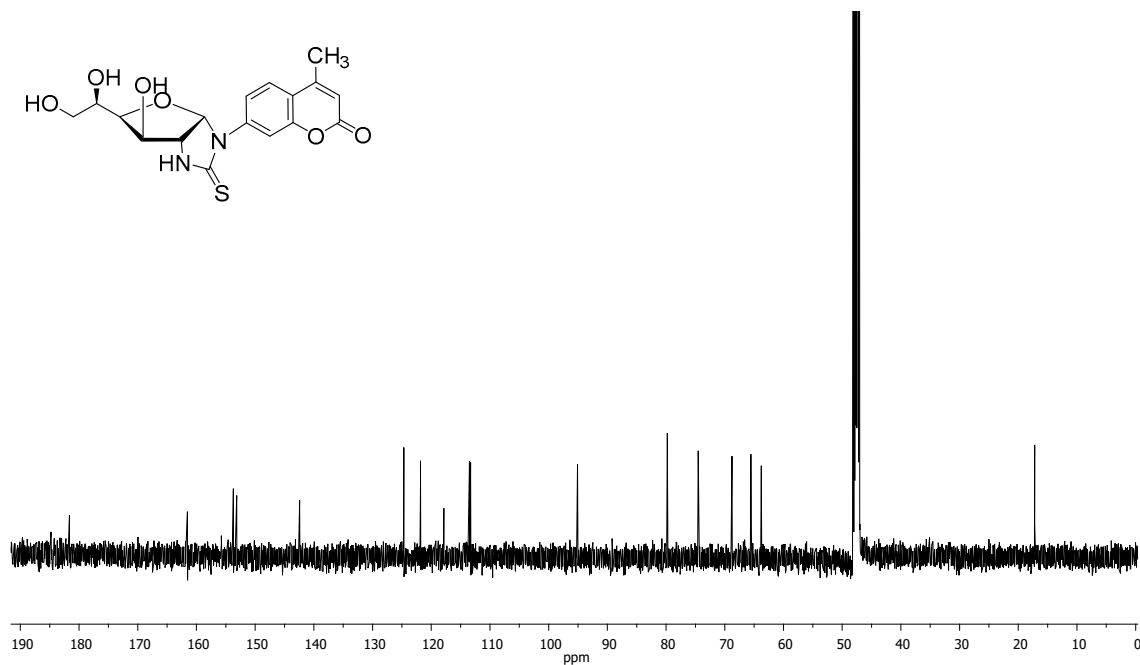

**Figure S14.** <sup>13</sup>C-NMR spectrum of **16** (125.7 MHz, DMSO-*d*<sub>6</sub>)



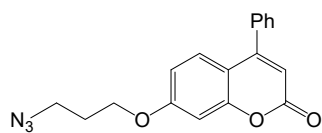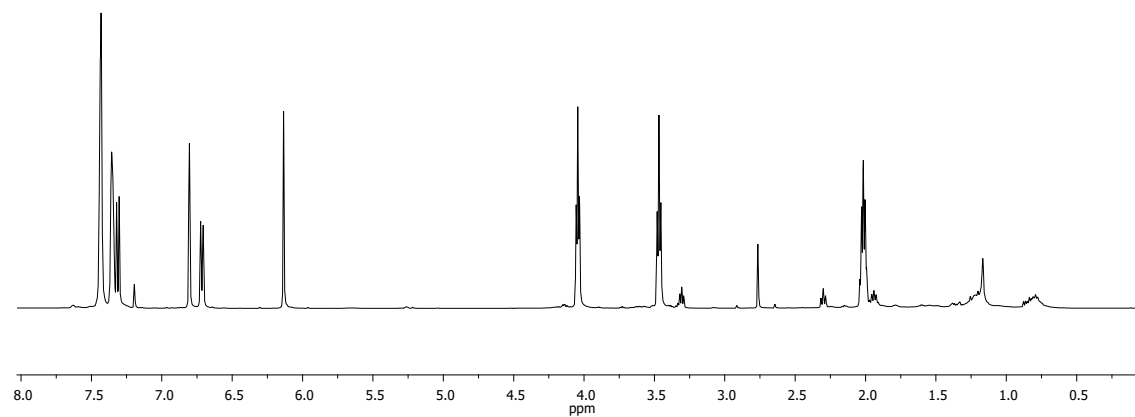

**Figure S15.** <sup>1</sup>H-NMR spectrum of **18d** (500 MHz, CDCl<sub>3</sub>)

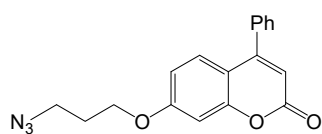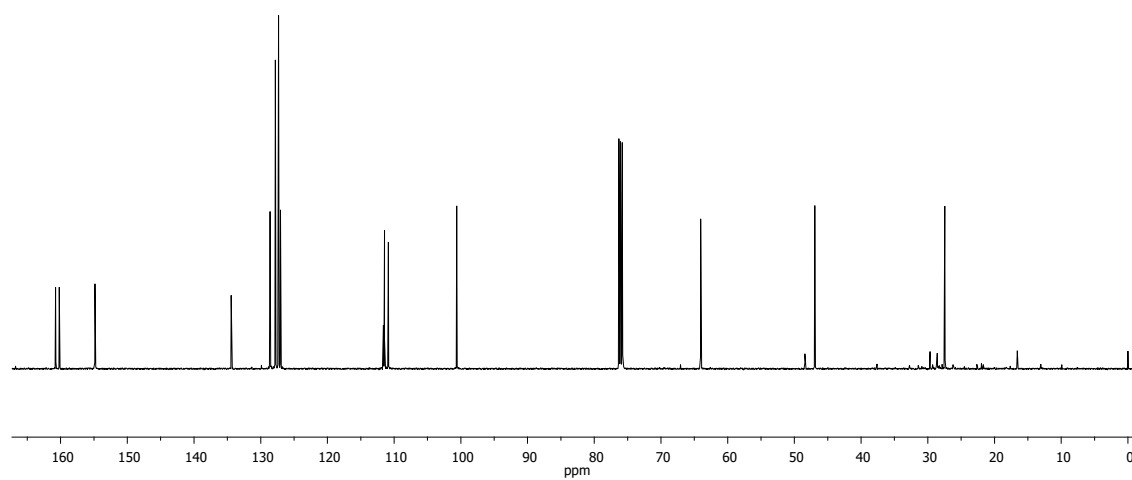

**Figure S16.** <sup>13</sup>C-NMR spectrum of **18d** (125.7 MHz, CDCl<sub>3</sub>)

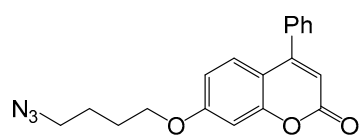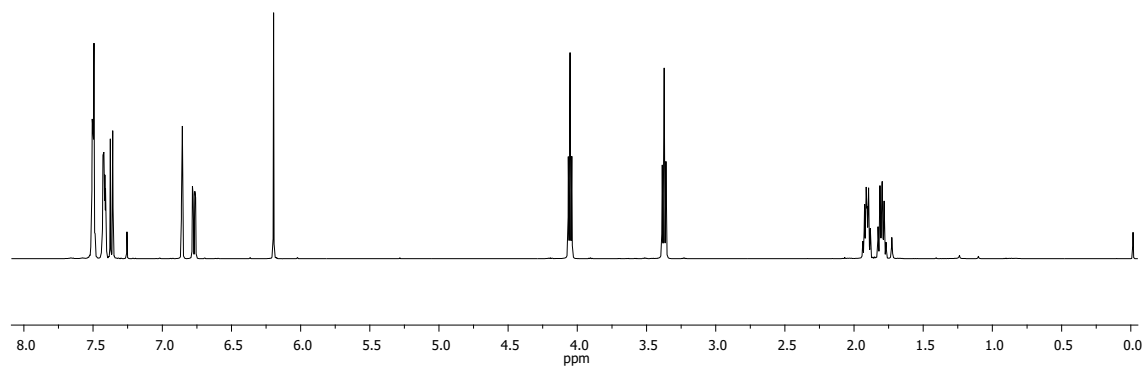

**Figure S17.** <sup>1</sup>H-NMR spectrum of **18e** (500 MHz, CDCl<sub>3</sub>)

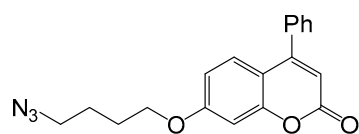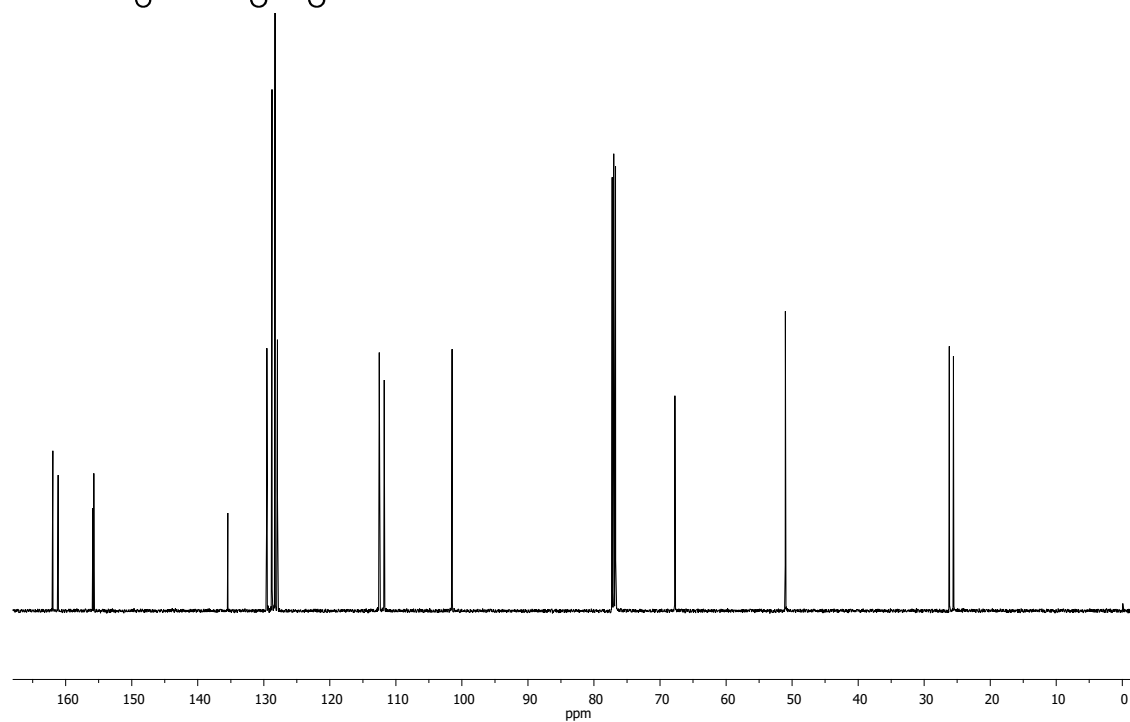

**Figure S18.** <sup>13</sup>C-NMR spectrum of **18e** (127.5 MHz, CDCl<sub>3</sub>)

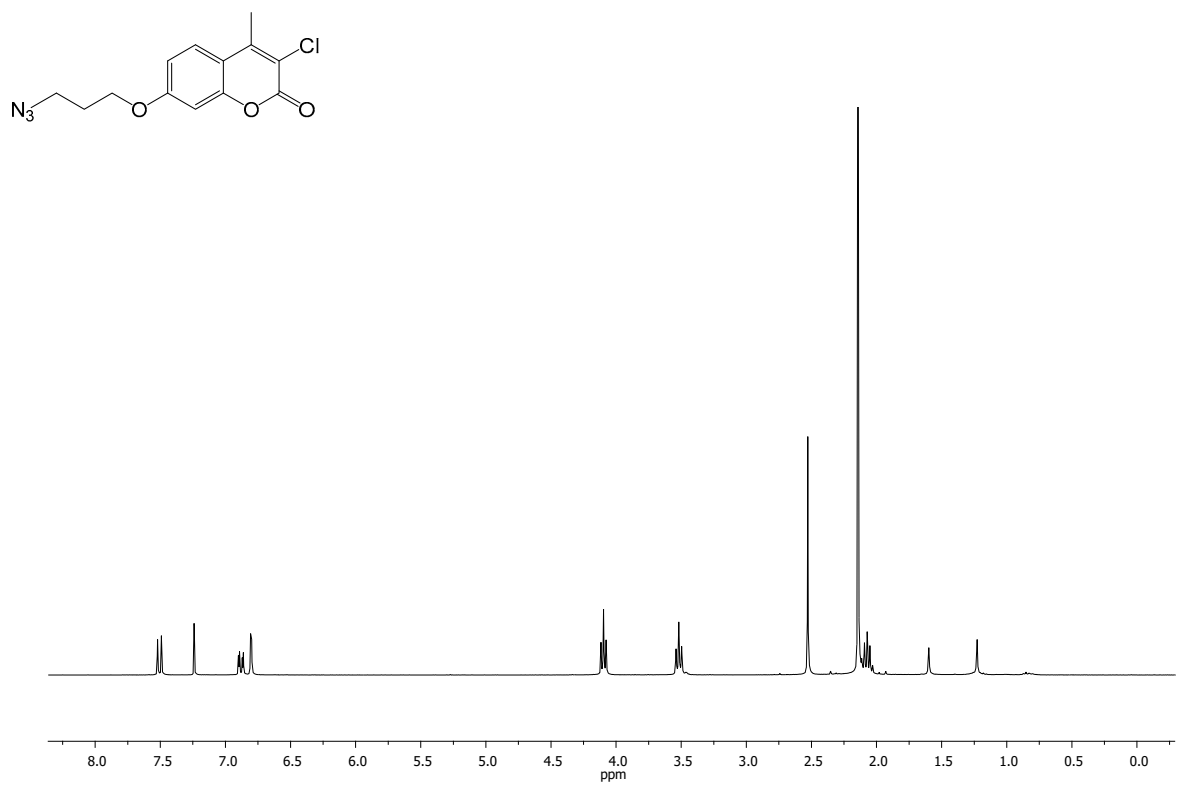

**Figure S19.** <sup>1</sup>H-NMR spectrum of **18g** (300 MHz, CDCl<sub>3</sub>)

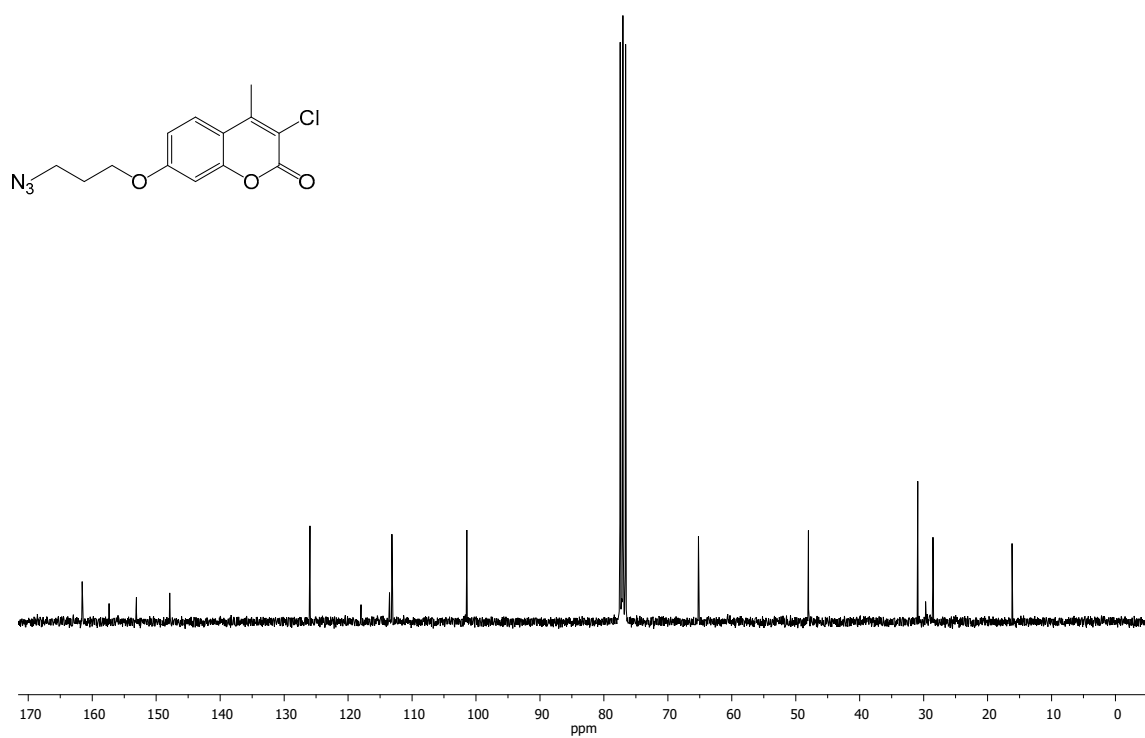

**Figure S20.** <sup>13</sup>C-NMR spectrum of **18g** (125.7 MHz, CDCl<sub>3</sub>)

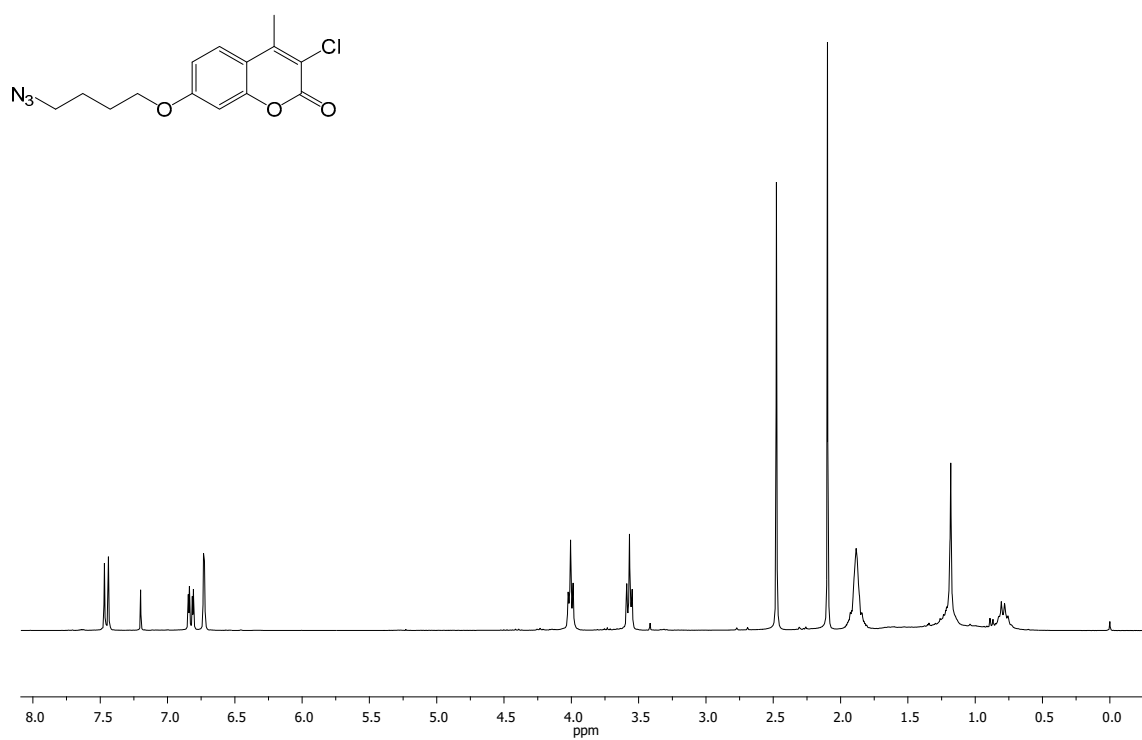

**Figure S21.** <sup>1</sup>H-NMR spectrum of **18h** (500 MHz, CDCl<sub>3</sub>)

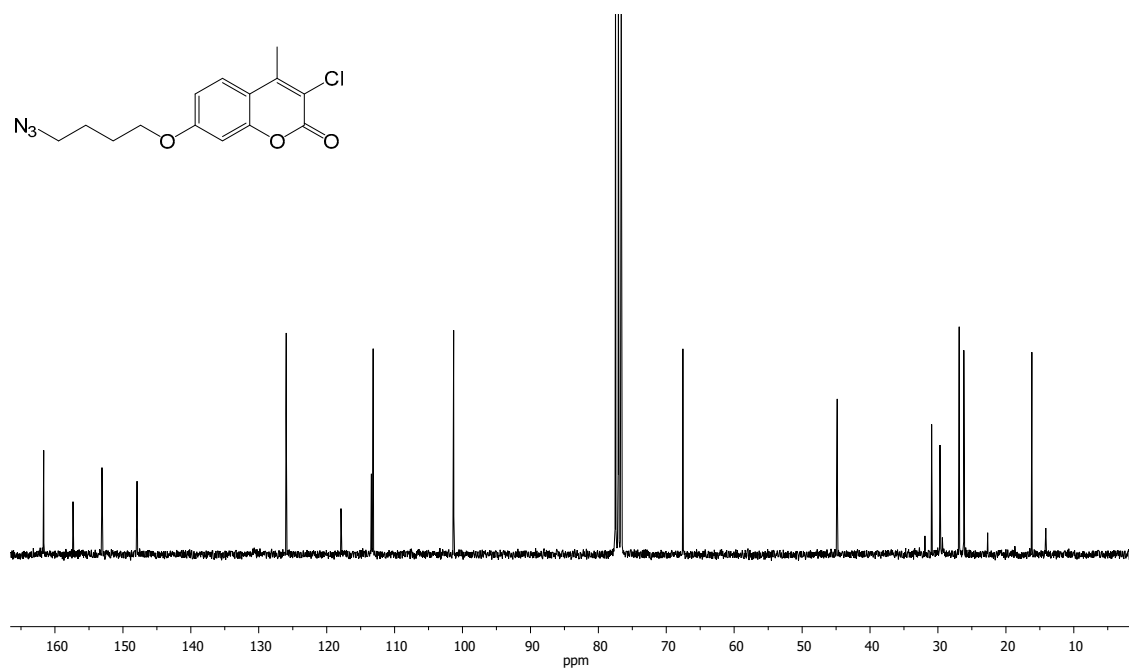

**Figure S22.** <sup>13</sup>C-NMR spectrum of **18h** (125.7 MHz, CDCl<sub>3</sub>)

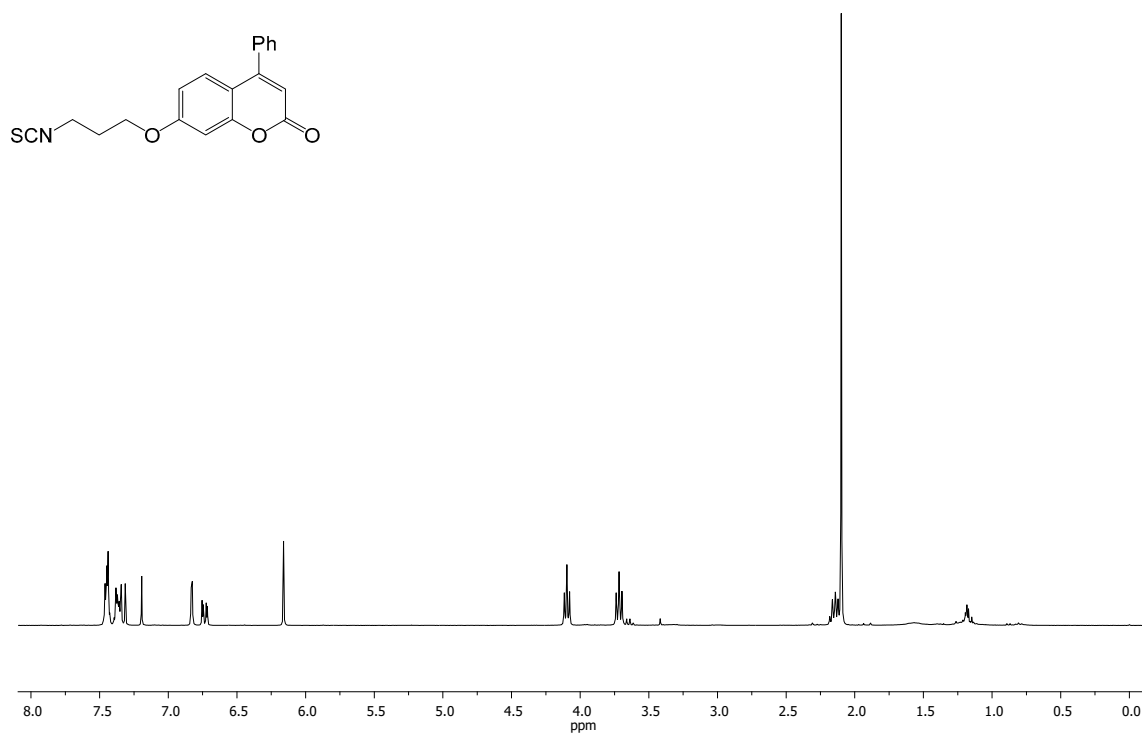

**Figure S23.** <sup>1</sup>H-NMR spectrum of **20d** (300 MHz, CDCl<sub>3</sub>)

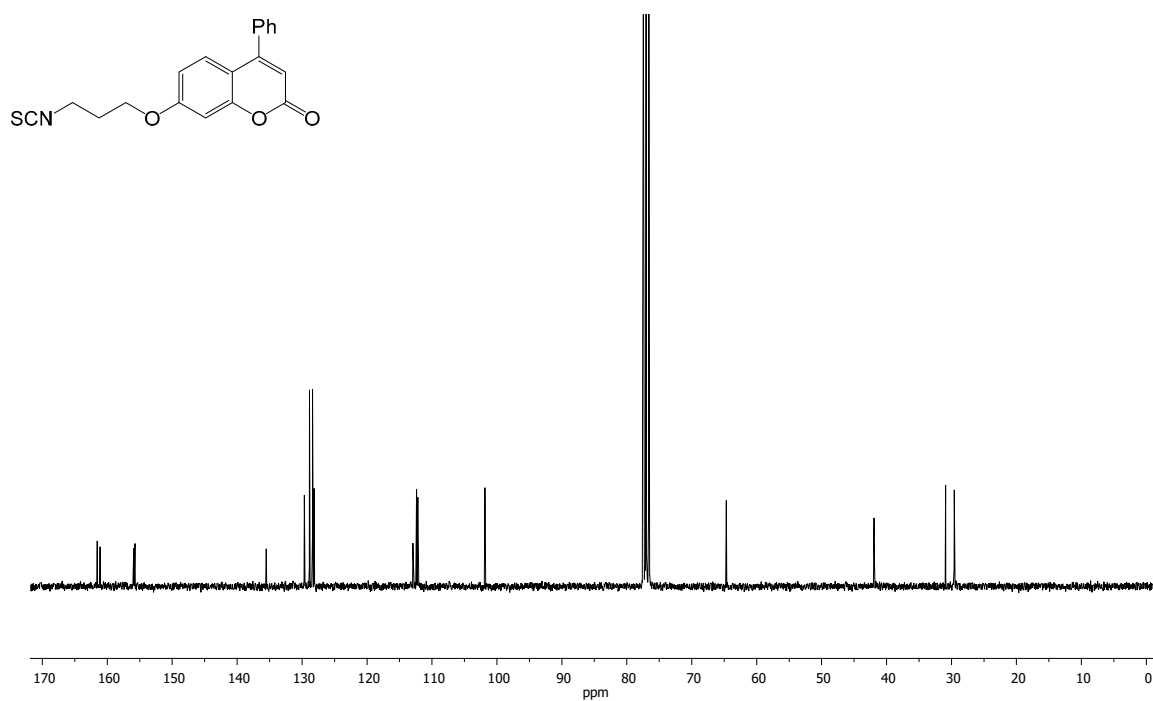

**Figure S24.** <sup>13</sup>C-NMR spectrum of **20d** (125.7 MHz, CDCl<sub>3</sub>)

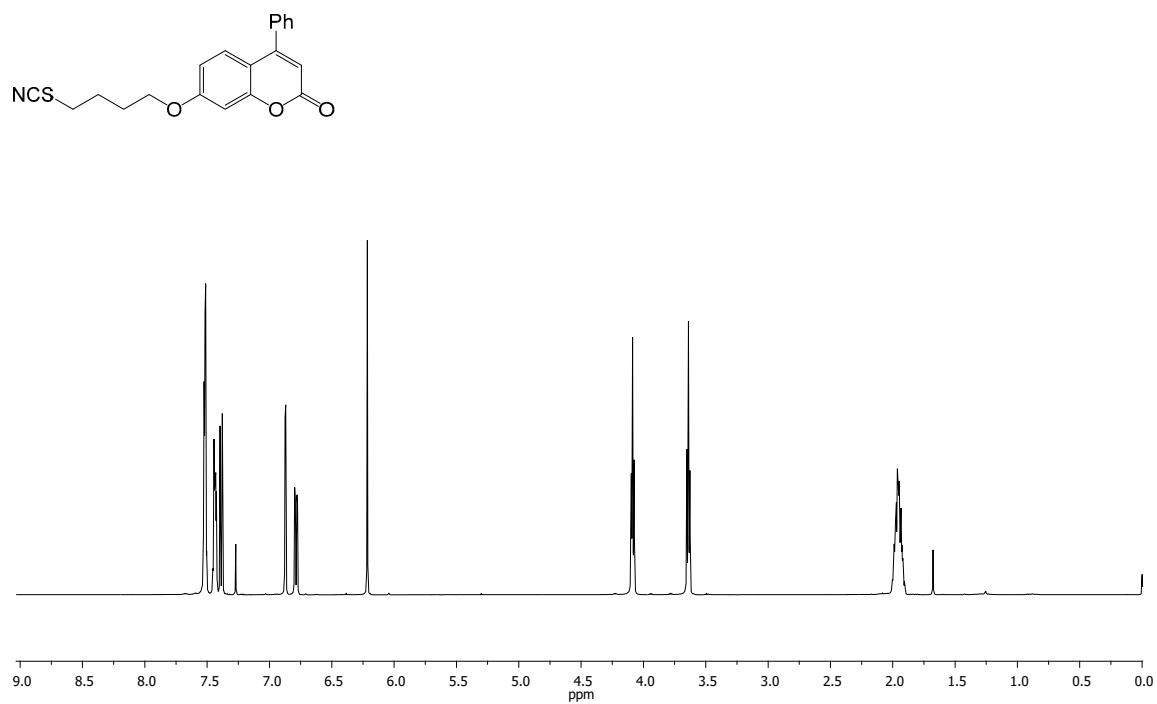

**Figure S25.**  $^1\text{H}$ -NMR spectrum of **20e** (500 MHz,  $\text{CDCl}_3$ )

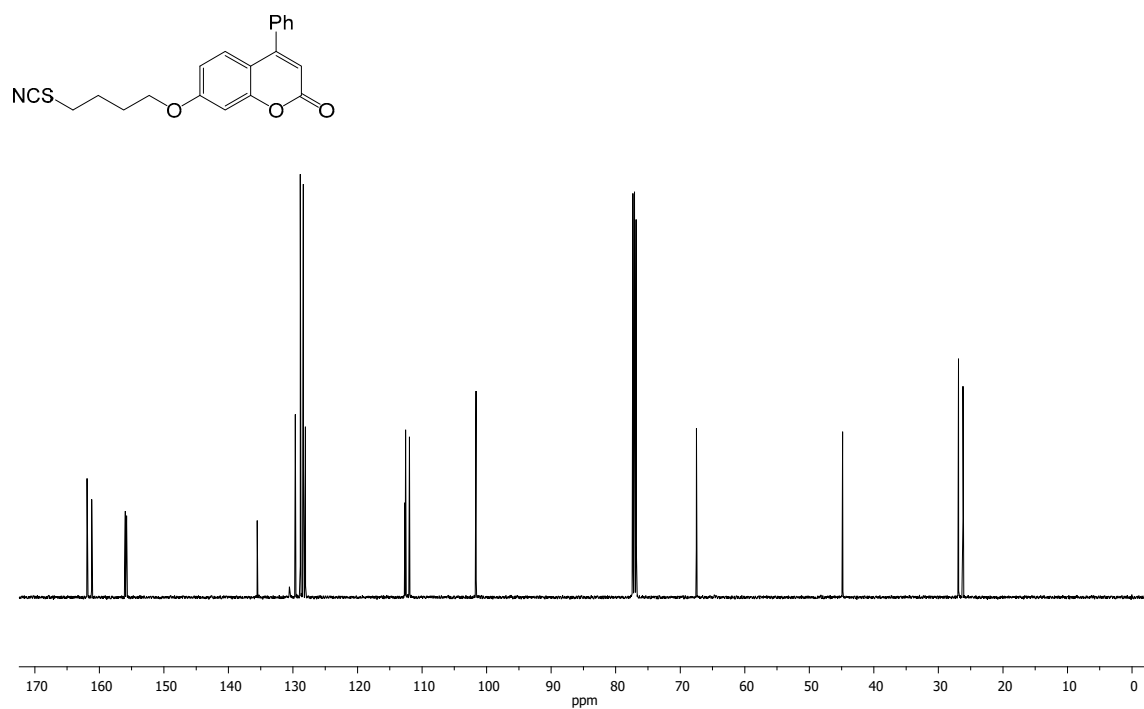

**Figure S26.**  $^{13}\text{C}$ -NMR spectrum of **20e** (125.7 MHz,  $\text{CDCl}_3$ )

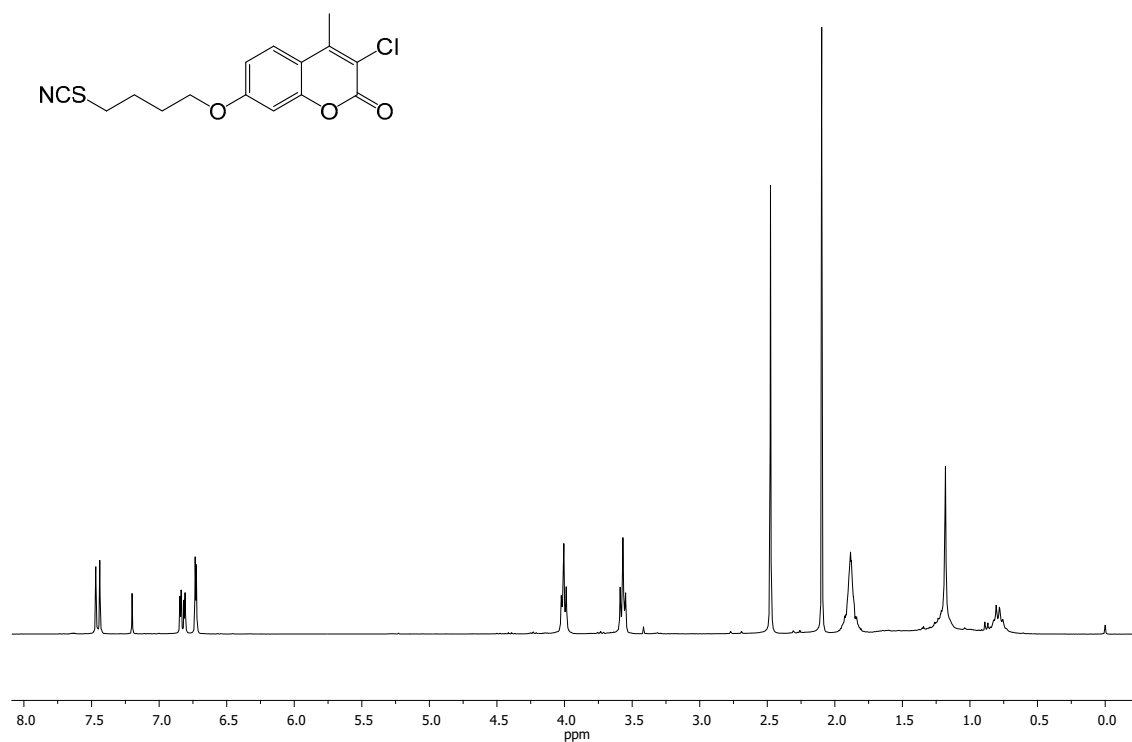

**Figure S27.**  $^1\text{H}$ -NMR spectrum of **20h** (300 MHz,  $\text{CDCl}_3$ )

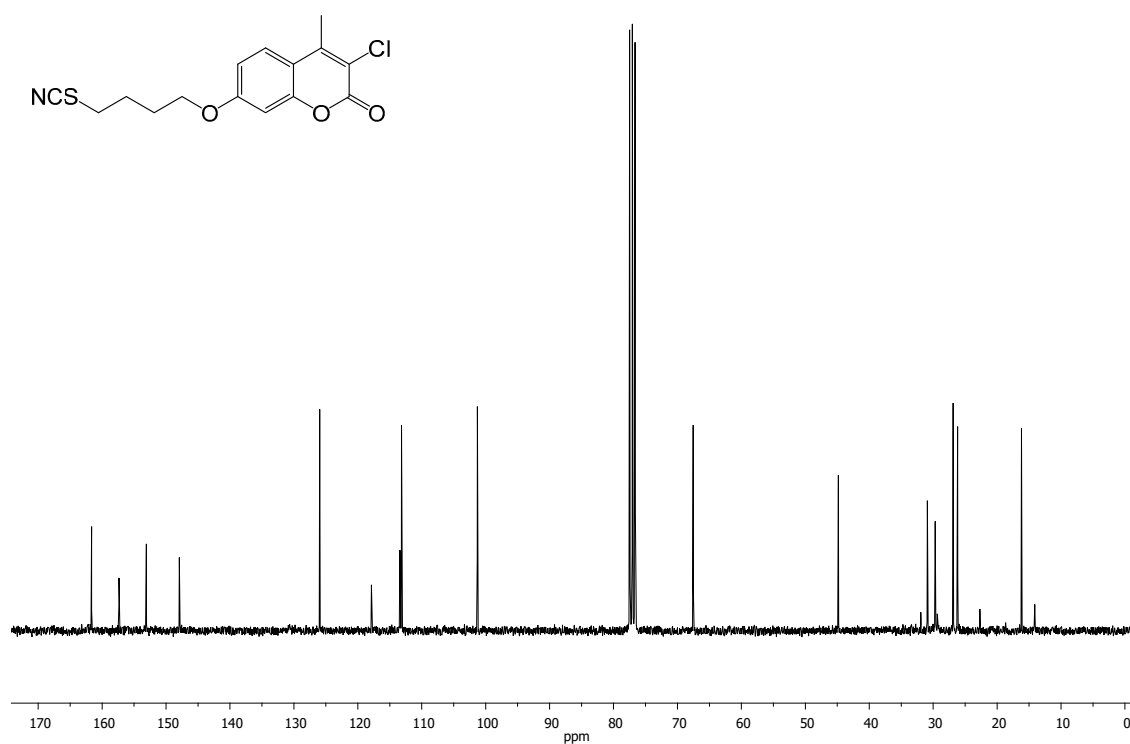

**Figure S28.**  $^{13}\text{C}$ -NMR spectrum of **20h** (125.7 MHz,  $\text{CDCl}_3$ )

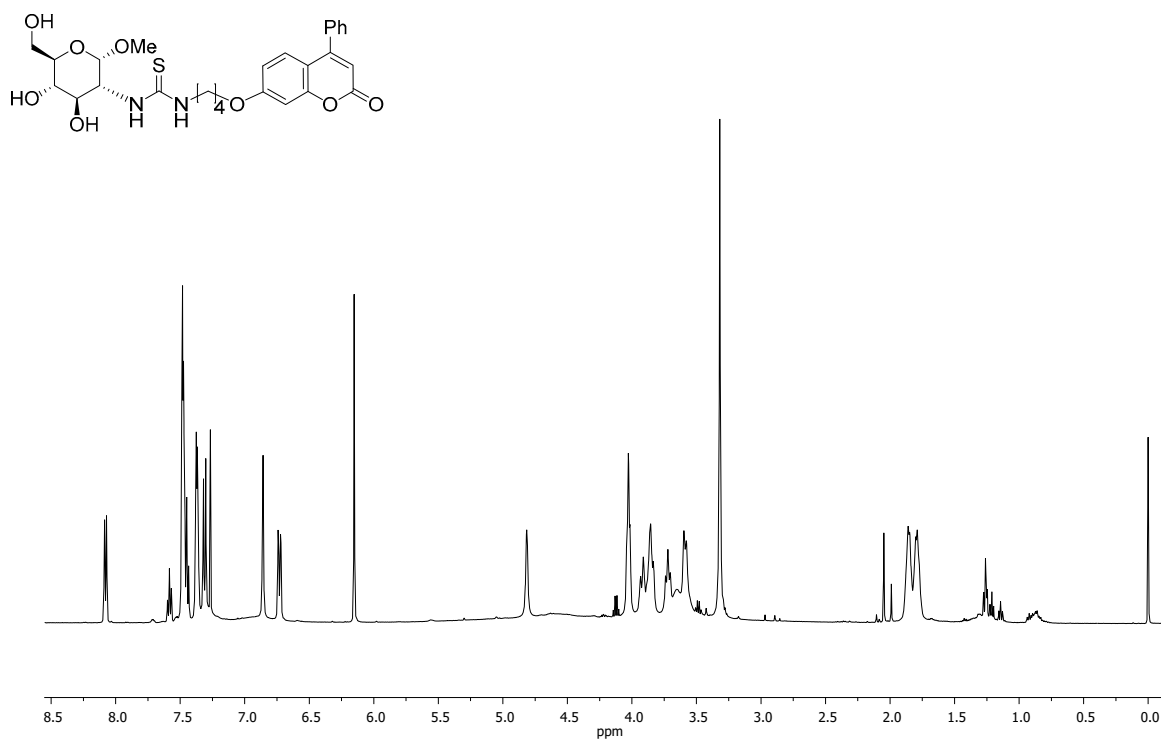

**Figure S29.** <sup>1</sup>H-NMR spectrum of **21e** (300 MHz, DMSO-*d*<sub>6</sub>-(CD<sub>3</sub>)<sub>2</sub>CO)

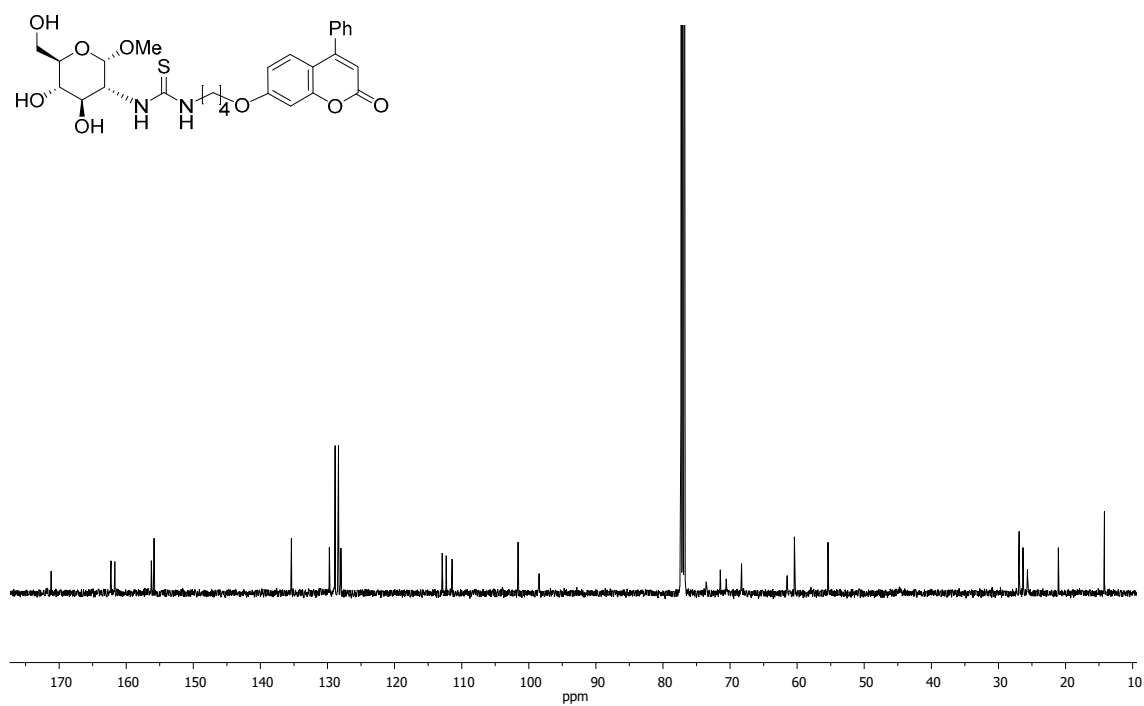

**Figure S30.** <sup>13</sup>C-NMR spectrum of **21e** (75.5 MHz, DMSO-*d*<sub>6</sub>)



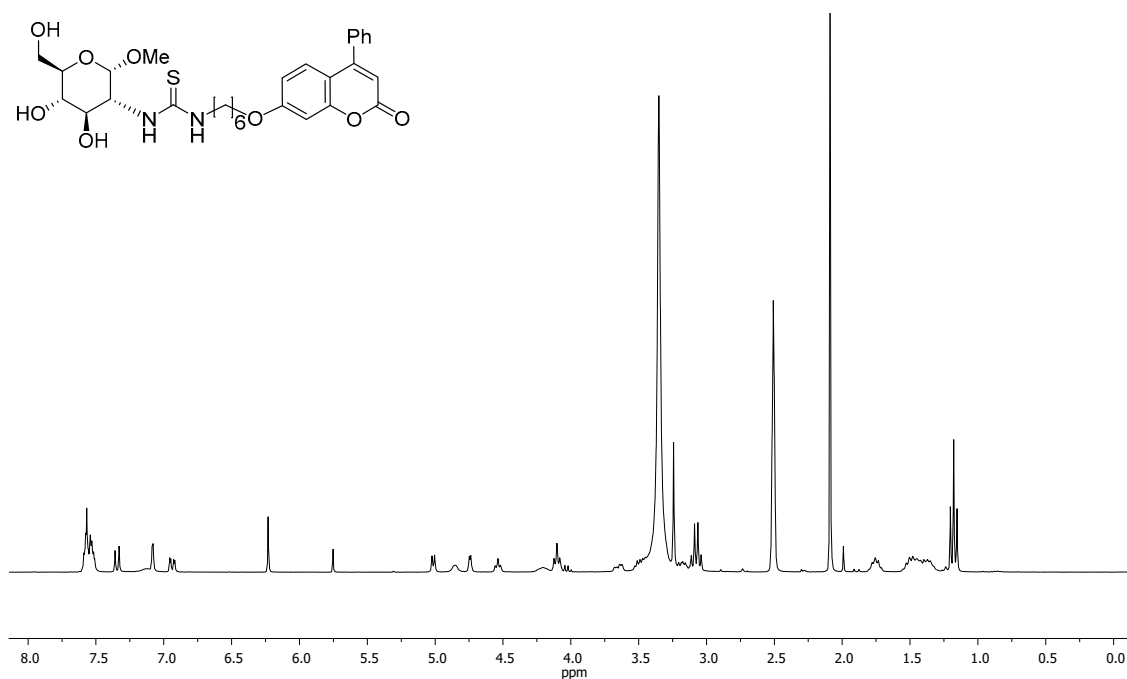

**Figure S31.**  $^1\text{H}$ -NMR spectrum of **21f** (300 MHz, DMSO- $d_6$ )

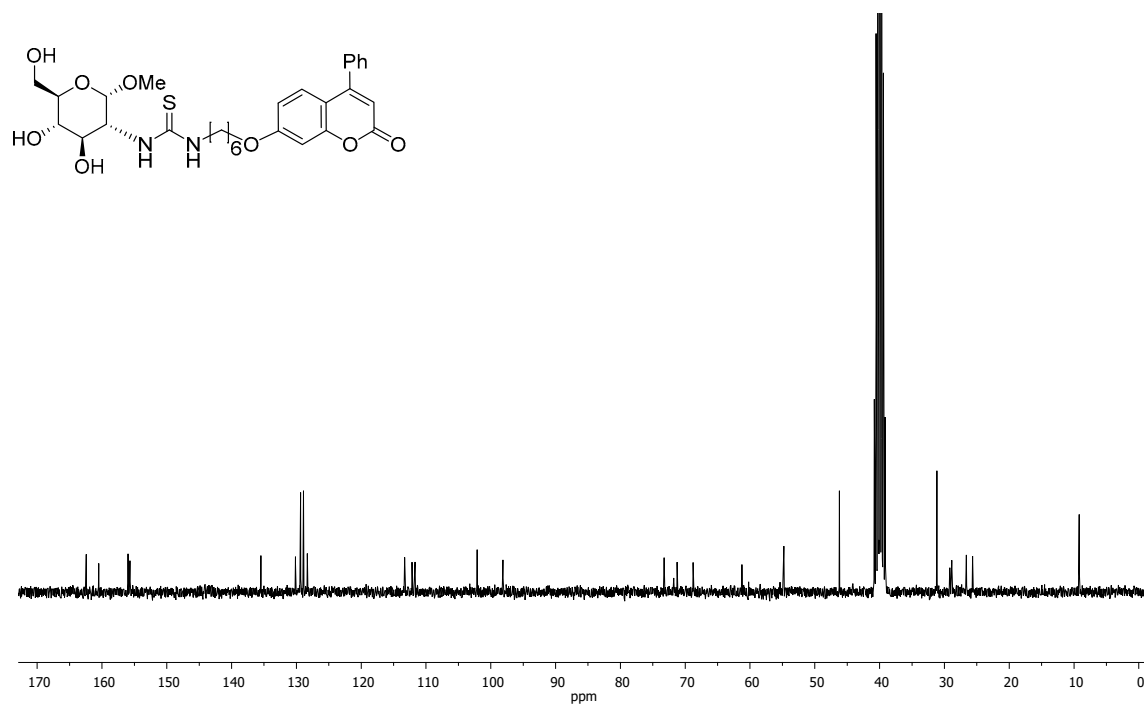

**Figure S32.**  $^{13}\text{C}$ -NMR spectrum of **21f** (75.5 MHz, DMSO- $d_6$ )

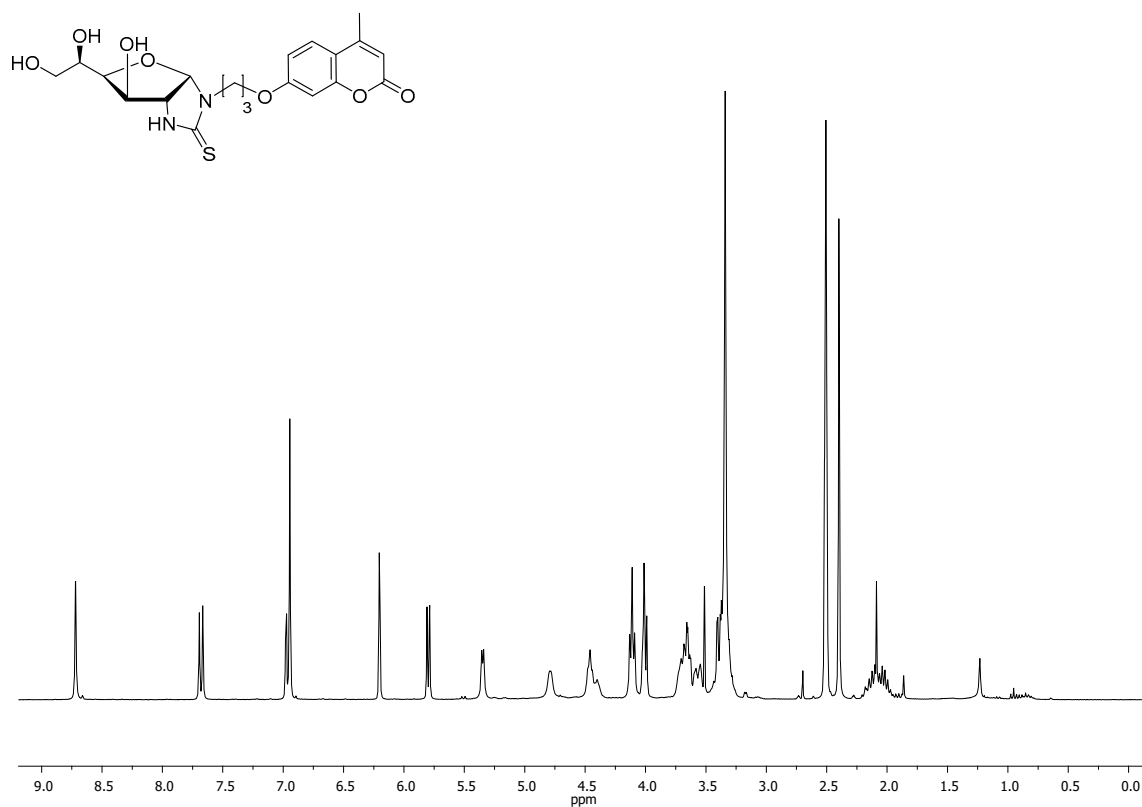

**Figure S33.**  $^1\text{H}$ -NMR spectrum of **24a** (300 MHz,  $\text{DMSO}-d_6$ )

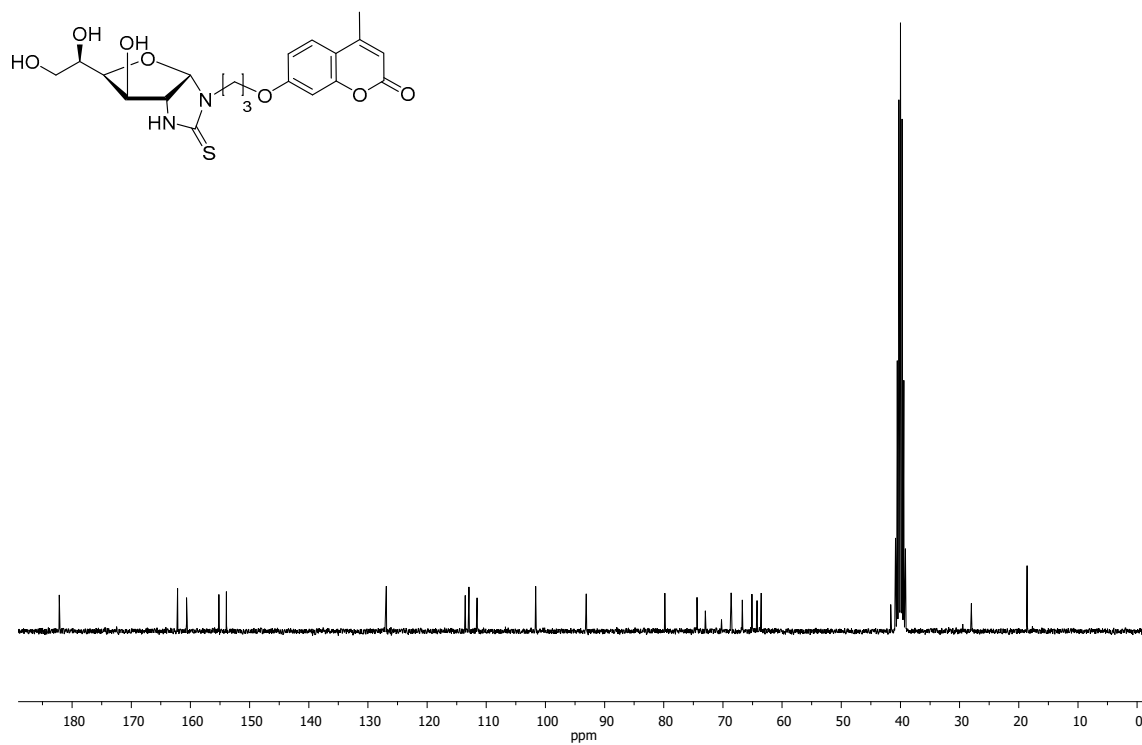

**Figure S34.**  $^{13}\text{C}$ -NMR spectrum of **24a** (75.5 MHz,  $\text{DMSO}-d_6$ )

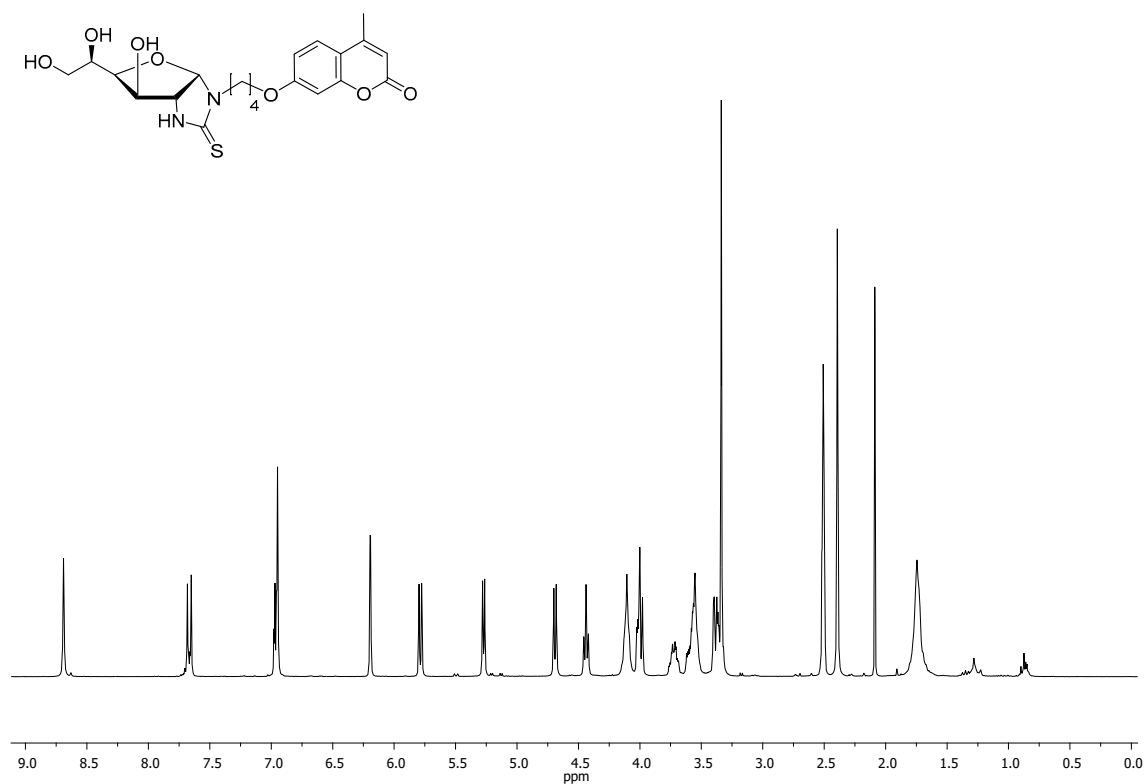

**Figure S35.** <sup>1</sup>H-NMR spectrum of **24b** (300 MHz, DMSO-*d*<sub>6</sub>)

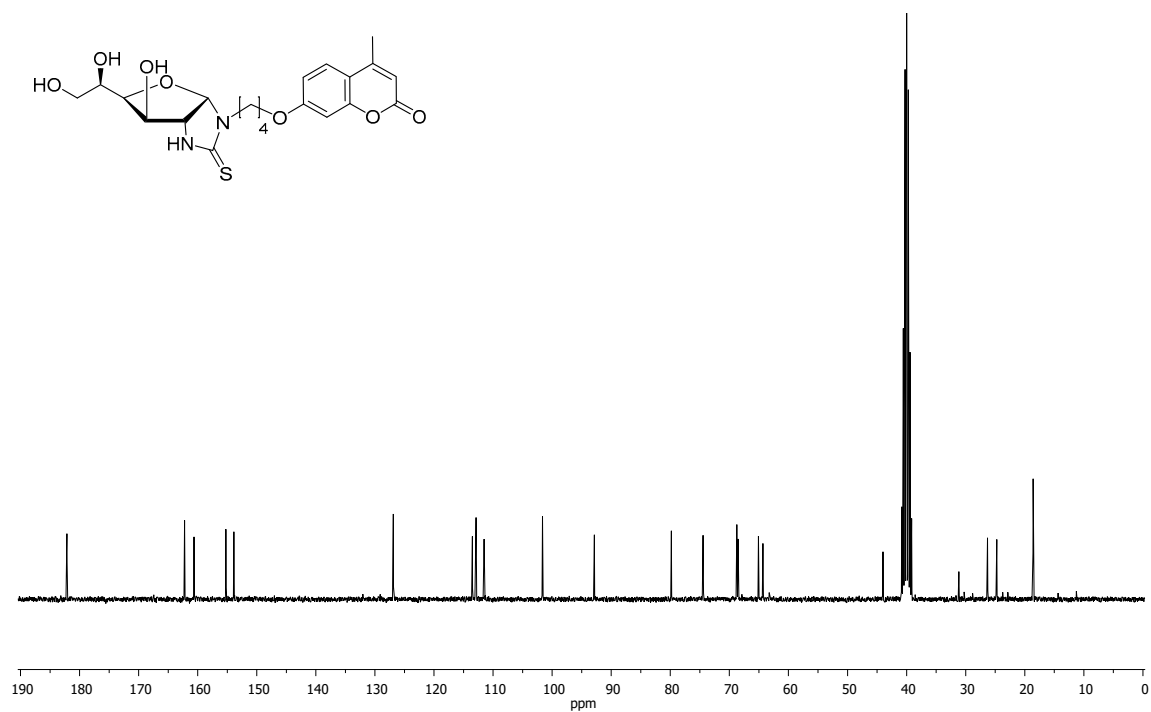

**Figure S36.** <sup>13</sup>C-NMR spectrum of **24b** (75.5 MHz, DMSO-*d*<sub>6</sub>)

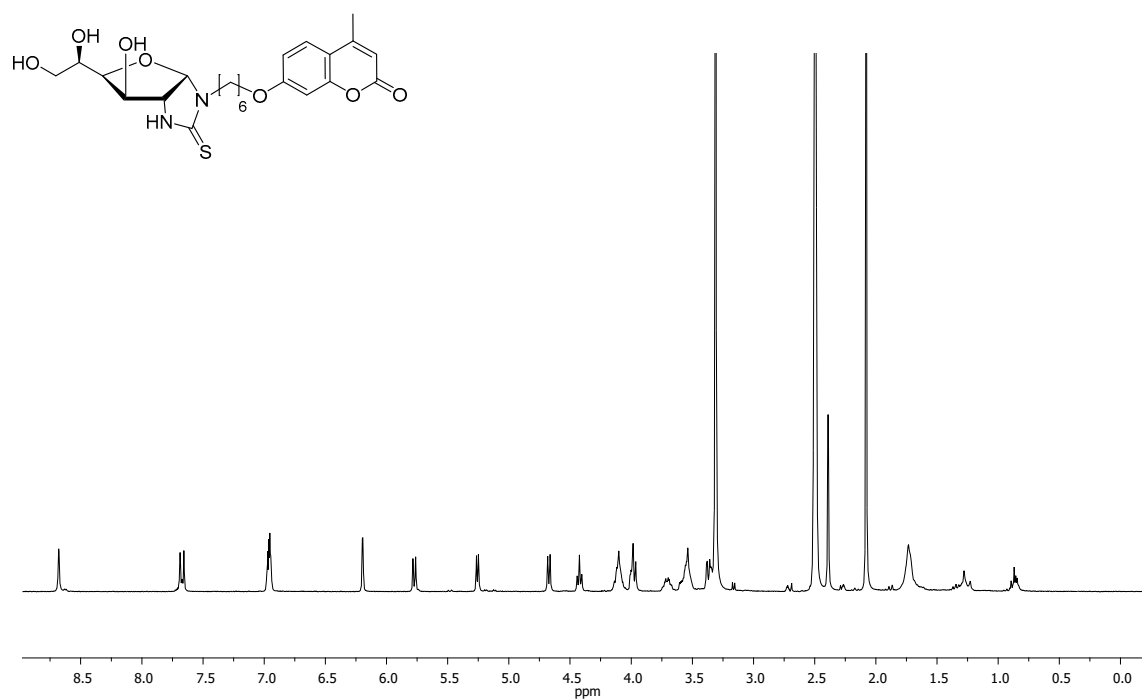

**Figure S37.**  $^1\text{H}$ -NMR spectrum of **24c** (300 MHz,  $\text{DMSO}-d_6$ )

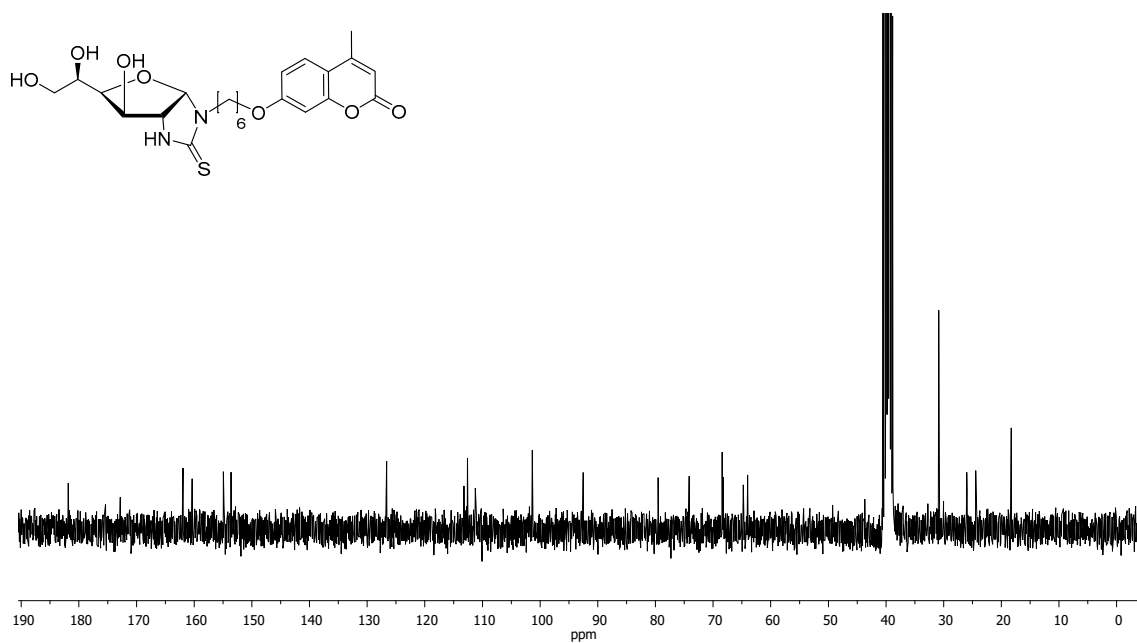

**Figure S38.**  $^{13}\text{C}$ -NMR spectrum of **24c** (75.5 MHz,  $\text{DMSO}-d_6$ )

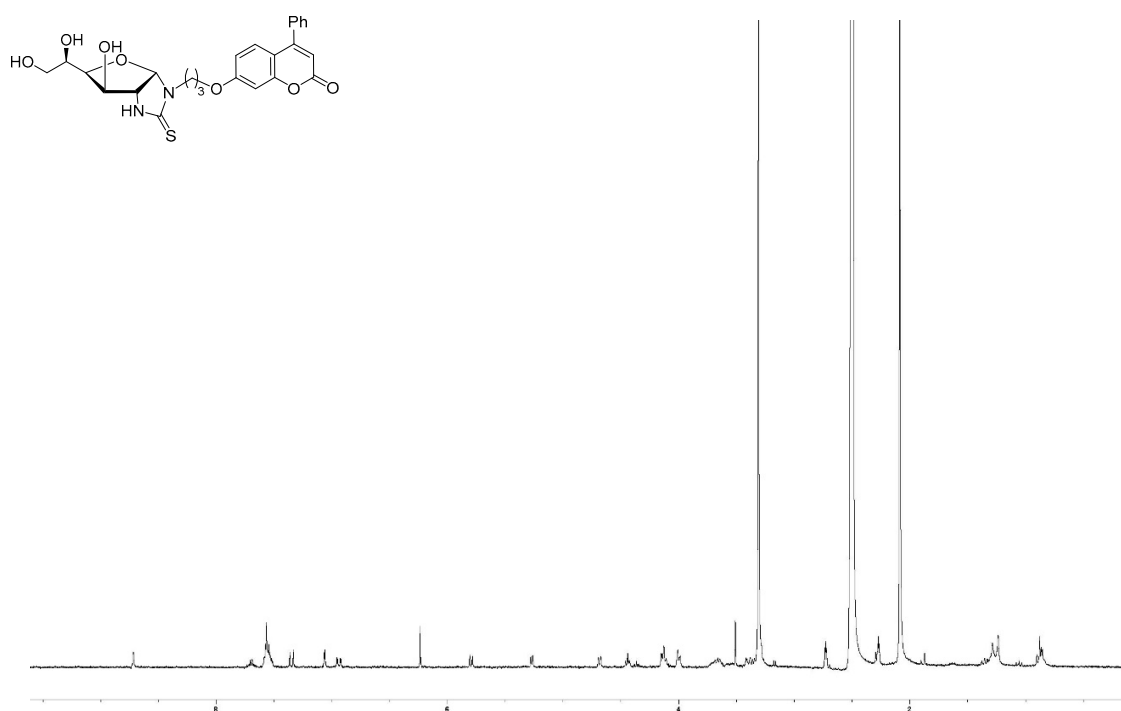

**Figure 39.** <sup>1</sup>H-NMR spectrum of **24d** (300 MHz, DMSO-*d*<sub>6</sub>)

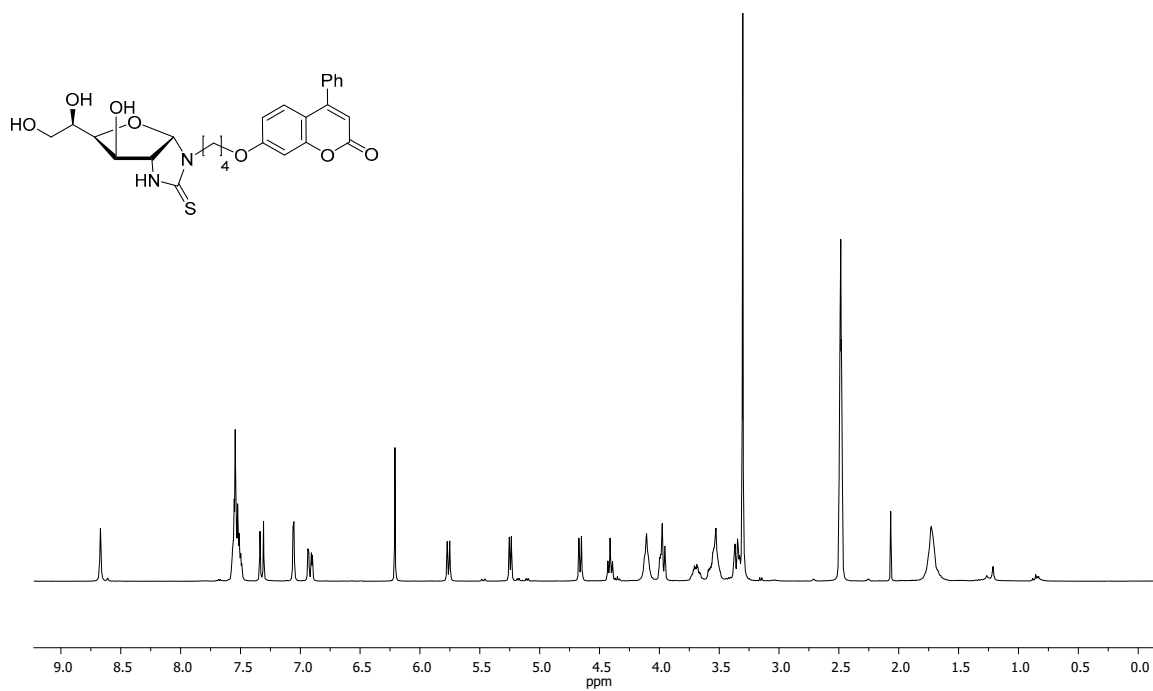

**Figure S40.**  $^1\text{H}$ -NMR spectrum of **24e** (300 MHz,  $\text{DMSO}-d_6$ )

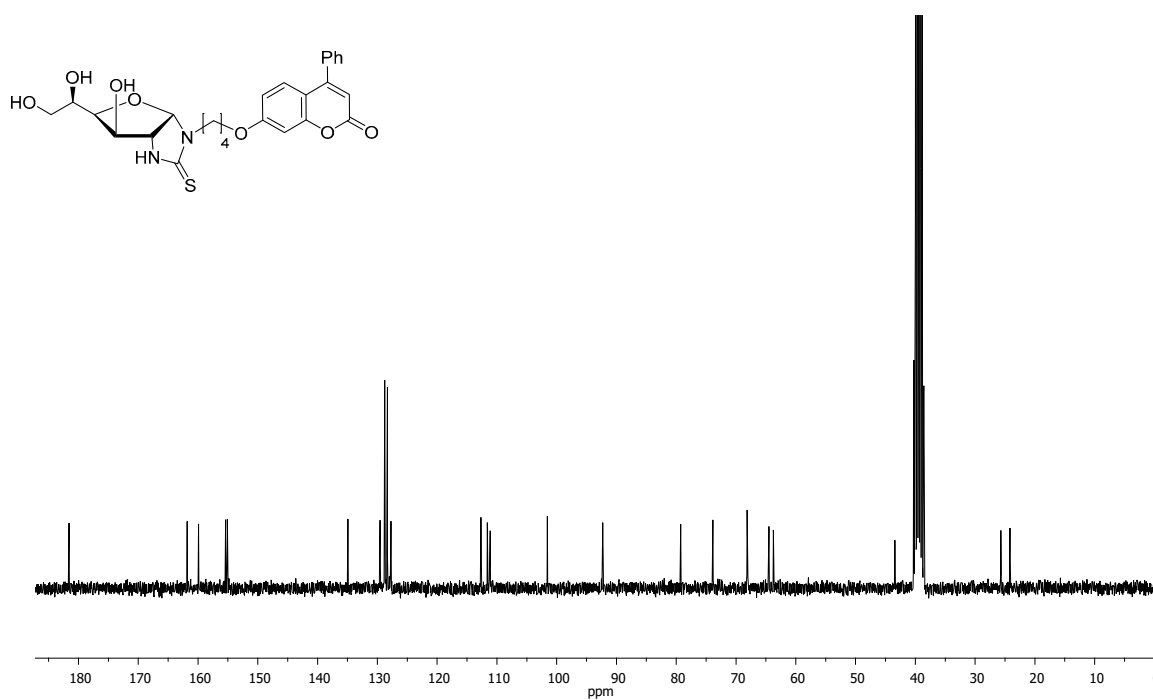

**Figure S41.**  $^{13}\text{C}$ -NMR spectrum of **24e** (75.5 MHz,  $\text{DMSO}-d_6$ )

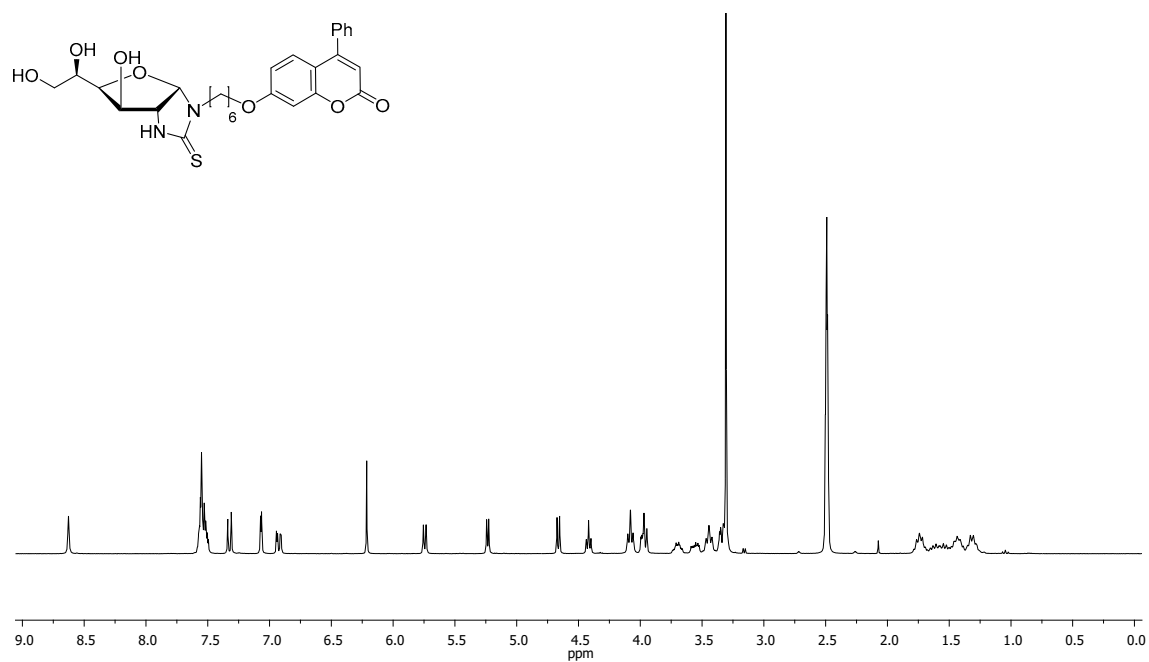

**Figure S42.**  $^1\text{H}$ -NMR spectrum of **24f** (300 MHz,  $\text{DMSO}-d_6$ )

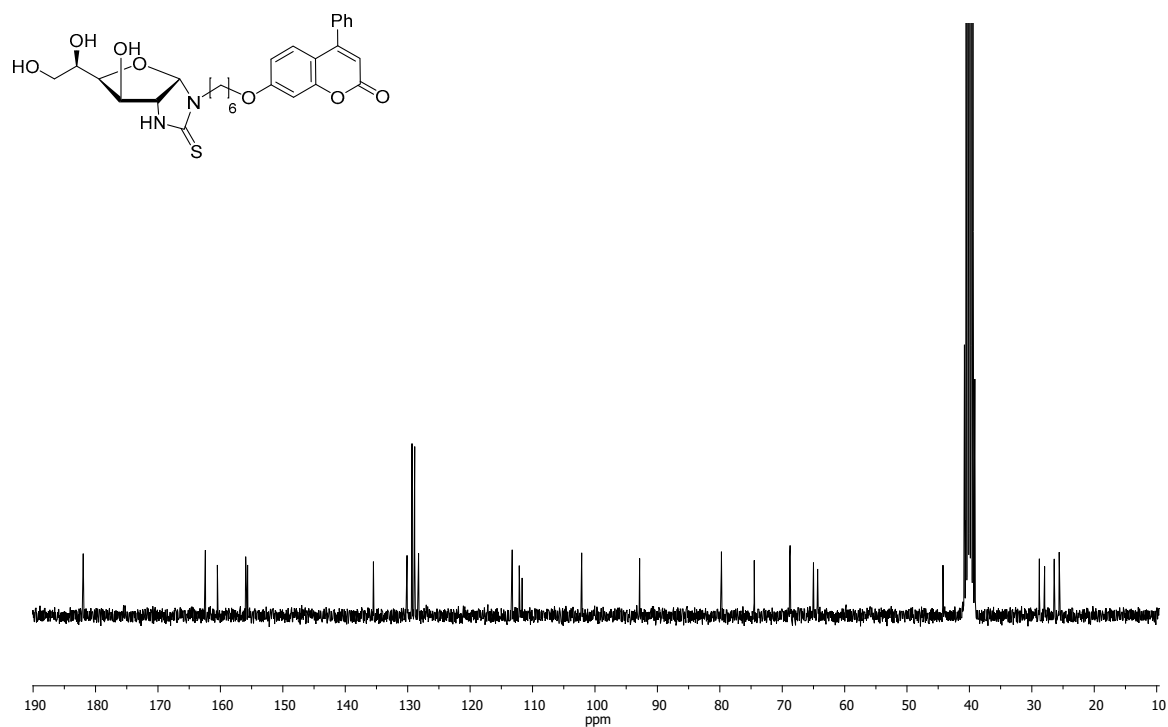

**Figure S43.**  $^{13}\text{C}$ -NMR spectrum of **24f** (75.5 MHz,  $\text{DMSO}-d_6$ )

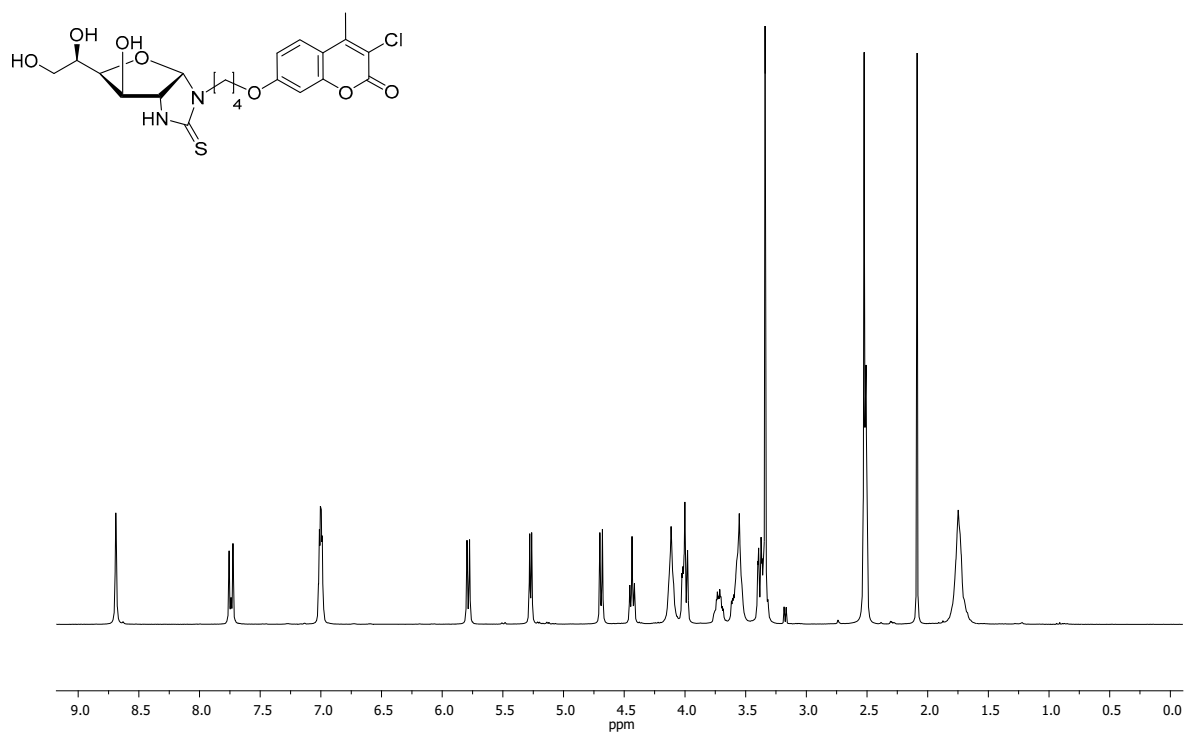

**Figure S44.** <sup>1</sup>H-NMR spectrum of **24h** (300 MHz, DMSO-*d*<sub>6</sub>)

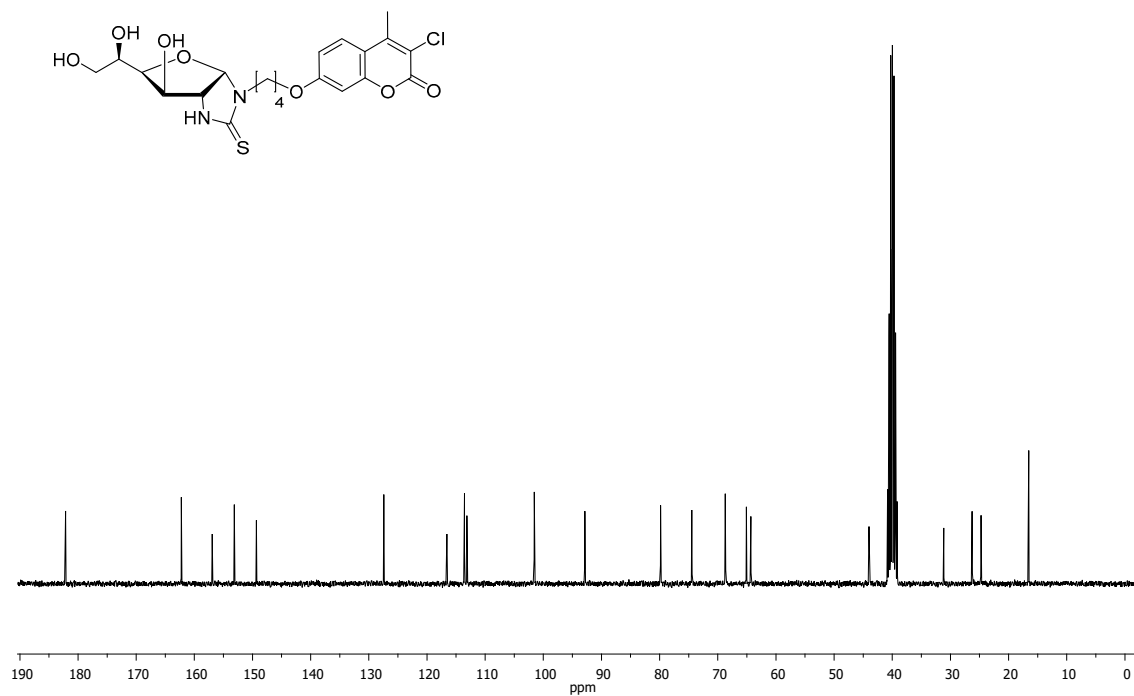

**Figure S45.** <sup>13</sup>C-NMR spectrum of **24h** (75.5 MHz, DMSO-*d*<sub>6</sub>)



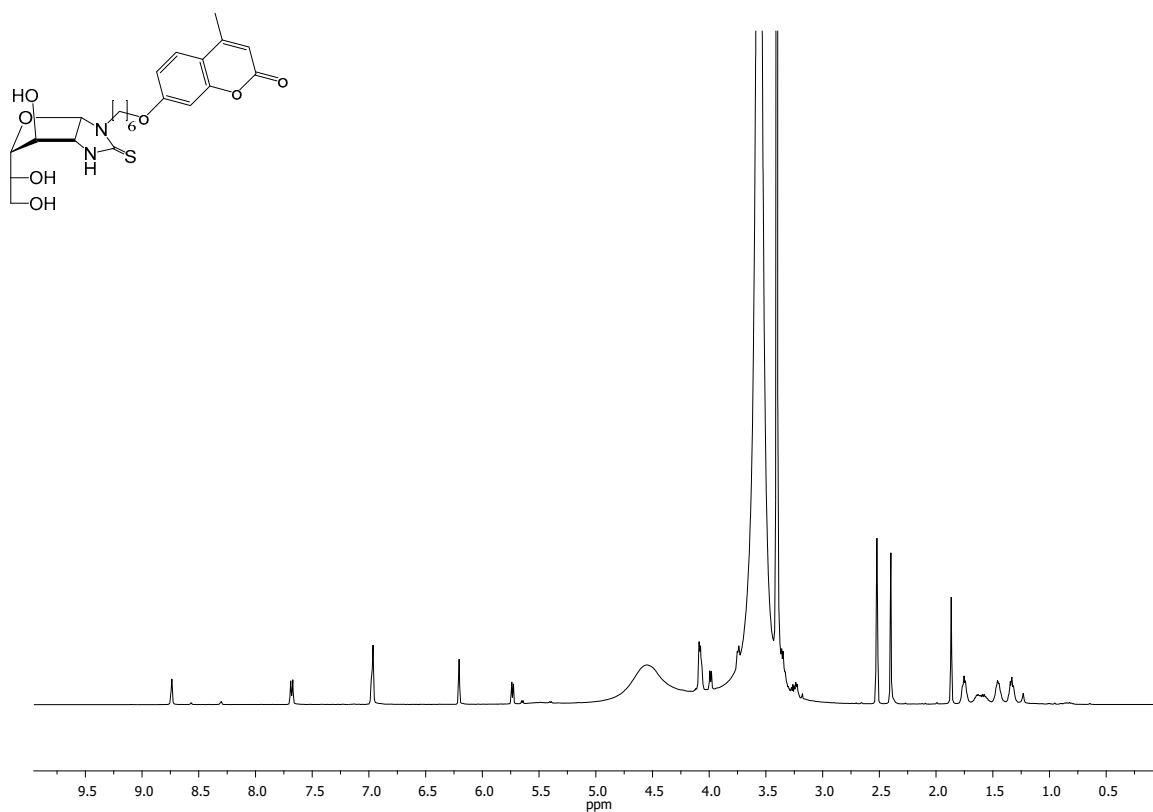

**Figure S46.** <sup>1</sup>H-NMR spectrum of **26** (500 MHz, DMSO-*d*<sub>6</sub>)

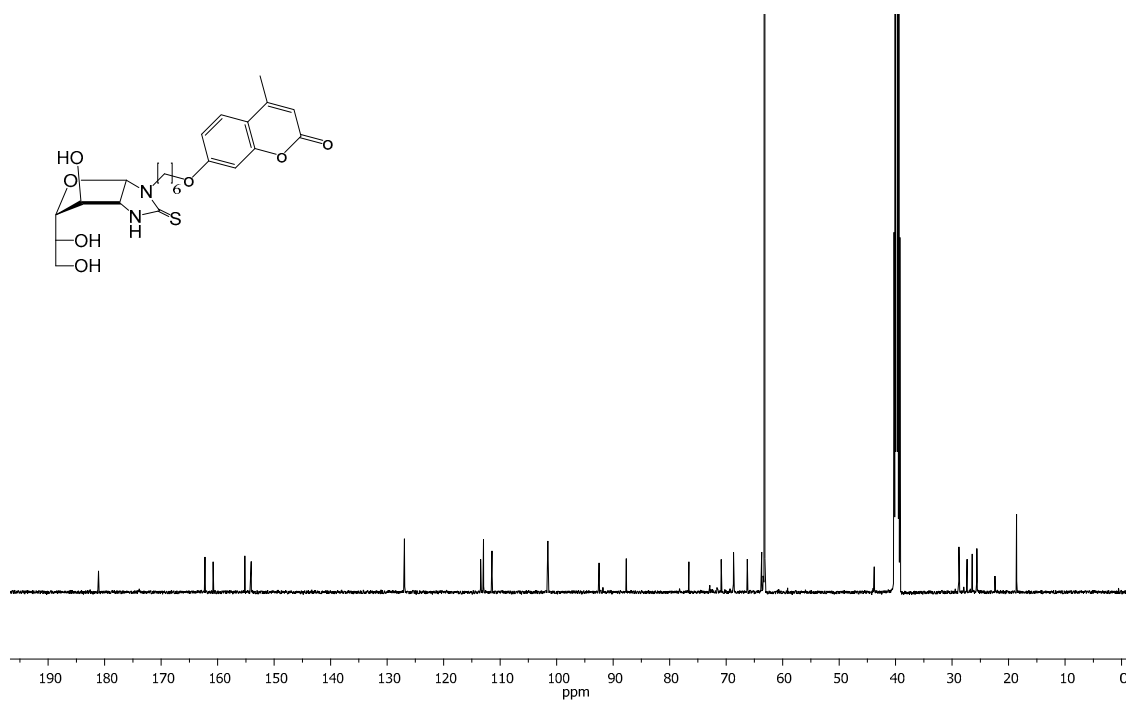

**Figure S47.** <sup>13</sup>C-NMR spectrum of **26** (125.7 MHz, DMSO-*d*<sub>6</sub>)
